1 **Exploring spatiotemporal changes in ecosystem**  
2 **service values and hotspots in Southwest of China,**  
3 **Mekong Region**

4 Zhuoya Zhang<sup>1,2</sup>, Junjie Yang<sup>2</sup>, Xin Yang<sup>3,\*</sup>, Fuming Xie<sup>4</sup>

5 <sup>1</sup> Faculty of Environmental Science and Engineering, Kunming University of Science  
6 and Technology, Yunnan, China

7 <sup>2</sup> Faculty of Geography and Ecotourism, Southwest Forestry University, Yunnan,  
8 China

9 <sup>3</sup> Communist Youth League Committee, Southwest Forestry University, Yunnan,  
10 China

11 <sup>4</sup> Institute of International River and Eco-security, Yunnan University, Yunnan, China

12 \* Corresponding author:

13 Xin Yang, Communist Youth League Committee, Southwest Forestry University, No.  
14 300, Bailong Road, Kunming, Yunnan, People's Republic of China.

15 Email: yangxin@swfu.edu.cn

16

17 **Abstract:** Xishuangbanna in the southwestern border of China is located in the upper  
18 reaches of the Mekong River between the Indo-China Peninsula and the East Asian  
19 continent. It is the largest tropical rain forest and monsoon forest in China. They have  
20 an irreplaceable ecological service function and are an important barrier to  
21 maintaining the ecological security of the Mekong River transboundary basin of the  
22 Lancang River. Based on three sets of remote sensing data (1996, 2003, 2010 and  
23 2016), this study has made an exploration on spatio-temporal changes of

24 Xishuangbanna, and also made an assessment on different ecosystem values of six  
25 types of ecosystem in Xishuangbanna based on related theories of ecological  
26 economics. Results showed that the values of Xishuangbanna ecosystem services in  
27 1996, 2003, 2010, and 2016 were 70.4014billion yuan, 70.2115 billion yuan, 68.5129  
28 billion yuan and 63.6098 billion yuan, respectively. The total value shows a  
29 continuous decreasing trend, reflecting the continuous decline in the ability of the  
30 Xishuangbanna ecosystem to provide services to humans.If divided by ecosystem  
31 types, forest and rubber were two types that have the greatest proportion of service  
32 values. In the perspective of service types, soil formation and protection account for  
33 the largest proportion, followed by gas regulation and biodiversity  
34 protection. Studying Xishuangbanna's ecosystem service values is helpful to explore  
35 the sustainable development of resources and economy.

36 **Keywords:** Ecosystem service values, hotspots, spatiotemporal changes, Southwest  
37 of China, Mekong Region

38 **Highlight:**

39 This paper used coefficient of sensitivity to determine the dependence of ESV on the  
40 change of ecosystem value coefficient over time.

41 The total amount of ESV shows a continuous downward trend, indicating that the  
42 ecological environment of Xishuangbanna is still severe.

43 The temporal-spatial change of ESV was analyzed for two decades.

44

## 45 **Introduction**

46 Ecosystem services (ES) refer to the various benefits that humans receive from  
47 ecosystems, including supply services, regulation services, support services and  
48 cultural services (Alcamo 2003, MEA 2005) . The intensification of human activities

49 has greatly accelerated the climate, environment and ecosystems of the planet. Urban  
50 ecosystems are increasingly threatened by urban population growth, urban land use  
51 expansion(Storkey, Döring et al. 2015, Leverkus and Castro 2017, Yang, Guan et al.  
52 2018, Kuriqi, Pinheiro et al. 2019), and socio-economic activities(Mensah, Veldtman  
53 et al. 2017, Song and Deng 2017), which affects the value of ecosystem services and  
54 ultimately the sustainable development of human society(Costanza, d'Arge et al. 1997,  
55 Sun, Liu et al. 2016) . Accurate assessment of ecosystem services value (ESV) is  
56 essential for urban construction planning and the improvement and restoration of  
57 urban ecosystems(Cui, Xiao et al. 2017), so it has received increasing attention from  
58 the research community(Costanza, Chichakly et al. 2014, Costanza, De Groot et al.  
59 2014, Leverkus and Castro 2017, Ossola and Hopton 2017).

60 As Costanza et al proposed the value of ecosystem services, especially after the  
61 Millennium Ecosystem Assessment, the impact of human activities on ecosystems has  
62 become an important research direction(Costanza, d'Arge et al. 1997, Robert,  
63 Costanza et al. 2005). Many scholars have emphasized that human activities are an  
64 important driving force for changing ecosystem services(Danz, Niemi et al. 2007,  
65 Robards, Schoon et al. 2011). The true economic value of ecosystem services depends  
66 on the interaction between the supply of ecosystems and the needs of society(Braat  
67 and de Groot 2012) (Robert, Costanza et al. 2005). Monetary valuation of the  
68 importance of ecosystem services to society can serve as a powerful and essential  
69 communication tool to provide a basis for better and more balanced decisions(De  
70 Groot, Brander et al. 2012). Scholars have found that basic income transfers can be a  
71 convenient way to determine ESVs globally and nationally, assuming a constant unit  
72 value per hectare for a given ecosystem type multiplied by the area of each type to  
73 arrive at a total (Costanza, De Groot et al. 2014).

74           The value of ecosystem services not only reflects the functions of ecosystem  
75 services, but also reflects the significance of human ecological environment and the  
76 demand for ecosystem services. Similarly, many scholars have analyzed the  
77 spatio-temporal changes of ESV, and their responses to land-use changes(Fengqin,  
78 Yan et al. 2016, Kindu, Schneider et al. 2016, Fei, Shuwen et al. 2018) or other  
79 human activities(Camacho-Valdez, Ruiz-Luna et al. 2014). Although it is important to  
80 have a better understanding of the temporal changes of ESVs, there is an increasing  
81 focus on determining the spatial changes of ESVs by identifying "hot spots" on  
82 ecosystem services(Li, Fang et al. 2016). These spatial studies can provide a range of  
83 useful tools that can effectively integrate ecosystem services into planned or current  
84 conservation plans(Naidoo, Balmford et al. 2008)], assess the effectiveness of  
85 implementing ecological policies, and prioritize the management of ecosystem  
86 services field(Egoh, Reyers et al. 2011, Li, Fang et al. 2016). This information is  
87 particularly important for modifying current ecological protection plans and policies  
88 in a more beneficial and targeted manner. For example, by linking the spatial changes  
89 in wetland area with the provision of ecosystem services and economic value, some  
90 scholars have analyzed the spatiotemporal changes in the service value of coastal  
91 landscapes in Southern Sinaloa (Mexico) (Camacho-Valdez, Ruiz-Luna et al. 2014).  
92 Bottalico [28] evaluated the spatial distribution of Molise ESV by developing a spatial  
93 explicit method(Bottalico, Pesola et al. 2016). Li et al. verified the spatiotemporal  
94 changes of ESV and its hot and cold issues in China(Li, Fang et al. 2016).However,  
95 ESVs are less well-characterized by hotspots that change over a specific spatial range,  
96 especially globally and nationally.

97           With the change of policies in Xishuangbanna, economic development and the  
98 advancement of urbanization, the transformation and occupation of land resources has

99 intensified, resulting in a periodical sharp change in land use types and areas. This  
100 change has a great impact on ESV in Xishuangbanna. In this paper, we investigated  
101 the spatiotemporal changes of ESV and identified hotspots and hotspots of ESV  
102 changes. The analysis was based on Xishuangbanna four-phase remote sensing image  
103 data from 1996 to 2016. In this context, studying the impact of ecosystem services in  
104 Xishuangbanna from the perspective of land use change in Xishuangbanna can clarify  
105 the state of the ecosystem under the "stress-state-response" in Xishuangbanna. This is  
106 of great significance for adjusting and optimizing the land use pattern in  
107 Xishuangbanna, promoting the coordination of sustainable development in  
108 Xishuangbanna, and protecting the stability of cross-border ecological security.

## 109 **1. Methods**

### 110 1.1 Study area

111 Xishuangbanna is located at 21 ° 10'-22 ° 40 ' north latitude and 99 ° 55'-101 °  
112 50 east longitude. It is on the tropical edge south of the Tropic of Cancer. The land  
113 area is 19,124.50 square kilometers. It is bordered by Puer City in the northeast and  
114 northwest, Laos in the southeast, and Myanmar in the southwest. The border line is  
115 966.3 kilometers long. The highest altitude is 2429 meters and the lowest altitude is  
116 477 meters. The whole state has jurisdiction over one city and two counties, Jinghong  
117 City, Menghai County, and Mengla County. The climate of Xishuangbanna is warm  
118 and moist all year round. There are no four seasons except the dry and wet seasons.  
119 The dry season runs from November to April of the year and the wet season runs from  
120 May to October.

### 121 1.2 Data sources and processing

122 The social and economic data of Xishuangbanna include the publicly released  
123 relevant data such as the website of the National Bureau of Statistics of the People's

124 Republic of China and the statistical yearbook of Xishuangbanna. The remote sensing  
125 image data include: availability images using vegetation-free cloud-free datasets,  
126 which consist of four Landsat TM / TM + / OLI remote sensing images from March  
127 1996 to April 1996, 2003, 2010, and April 2016, respectively.

128 Based on field surveys, combined with remote sensing data spectral information,  
129 we referenced the second-level survey data of forest resources in 2006 and 2016 to  
130 construct a remote sensing interpretation mark for land use in Xishuangbanna.  
131 Support Vector Machine (SVM) supervised classification method was used for The  
132 land use type data were interpreted and the land use types in the fourth phase of the  
133 study area were obtained. After the four-phase image classification, the total accuracy  
134 Kappa coefficients are 85.9%, 86.7%, 89.9%, and 93.5%, which meet the research  
135 needs.

### 136 1.3 Calculation of ESV in Xishuangbanna

#### 137 1.3.1 Ecosystem classification

138 According to China's latest classification standard for land use status (GB /  
139 T21010-2007), and combined with the actual local conditions in Xishuangbanna, the  
140 ecosystem in Xishuangbanna is divided into forest ecosystem, rubber ecosystem, tea  
141 garden ecosystem, farmland ecosystem, watershed ecosystem, and construction land  
142 ecosystem.

#### 143 1.3.2 Evaluation method of ESV in Xishuangbanna

##### 144 (1) Modification of Xishuangbanna'ESV Equivalent Factor

145 In this study, the tea garden ecosystem was taken as the average value of  
146 woodland and grassland(Xiao-qing, Ze-xian et al.). The forest ecosystem equivalent  
147 factor in Xishuangbanna was revised to 1.96 times the national average(Xiaosai,  
148 Yongming et al. 2015), and the rubber ecosystem equivalent factor was revised to

149 1.60 times the national average(Yuanfan, Qingzhong et al. 2010). Based on the above  
150 amendments, the Xishuangbanna ESV Equivalent Scale was obtained.

151 (2) Functional value of food production per unit area of cultivated land  
152 ecosystem in Xishuangbanna

153 In order to eliminate the influence of crop price fluctuations on the total value in  
154 each year and region, the basic data were selected from the sown area, total output  
155 and average price of three main crops (rice, upland rice, and corn) in 1997 in  
156 Xishuangbanna. According to Xie Gaodi's research, the economic value of a standard  
157 unit ecosystem service value equivalent factor is equal to 1/7 of the average market  
158 value of a single grain(Gaodi, Chunxia et al. 2003, Xiaosai, Yongming et al. 2015).

159 The calculation is as follows:

160

161 
$$E_n = \frac{1}{7} \sum_{i=1}^n \frac{m_i q_i p_i}{M} (n = 1, 2, 3)$$

162 Among them,  $E_n$  is the economic value (yuan / hm<sup>2</sup>) of providing food  
163 production and service functions for a unit of cultivated land ecosystem.  $i$  is the type  
164 of crop.  $p_i$  is the price of  $i$  crops (yuan / kg).  $q_i$  is the yield of  $i$  food crops (kg /  
165 hm<sup>2</sup>).  $m_i$  is the area of  $i$  food crops (hm<sup>2</sup>).  $M$  is the total area of  $n$  food crops  
166 (hm<sup>2</sup>).

167 (3) Calculation method of Xishuangbanna 'ESV

168 We used the ESV formula of Costanza et al. to calculate the ESV of  
169 Xishuangbanna (Robert, Costanza et al.). In order to facilitate the analysis of the  
170 changes in the value of ecosystem services in Xishuangbanna and to compare the  
171 value of ecosystem services in different regions, this study adds two indicators to the  
172 calculation method of ecosystem service values, the Ecosystem Services Contribution

173 Rate (ESCR) and Ecosystem Services Value per unit (UESV) (Tianhai, field et al.  
174 2018). The value of the ecosystem per unit area is to reduce the difference in the size  
175 of different ecosystems and to facilitate comparison. The calculation is as follows:

176

177 
$$ESV = \sum V_i \times A_i$$

178 
$$ESV_k = \sum V_{ki} \times A_{ki}$$

179 
$$ESCR = \frac{\Delta ESV_k}{ESV}$$

180 
$$UESV = \frac{ESV}{A}$$

181 Among them,  $ESV$  is the total value of ecosystem services in the study area.  $V_i$   
182 is the ecosystem service value coefficient of ecosystem type  $i$  per unit area.  $A_i$  is the  
183 area of ecosystem type in the study area.  $ESV_k$  is the value of the  $k$ -th service of the  
184 ecosystem.  $V_{ki}$  is the  $k$ -th ecosystem service value coefficient of the  $i$ -th ecosystem  
185 type.  $ESCR$  is the change in the value of a single ecosystem service  $\Delta ESV_k$  to the  
186 total value of ecosystem services.  $UESV$  is the ratio of total ecosystem service value  
187  $ESV$  to total area  $A$ .

#### 188 (4) Calculation method of Coefficients of Sensitivity(CS)

189 This study applied CS to measure the representativeness of individual ecosystem  
190 services to each ecosystem type and the accuracy of the value of ecosystem services  
191 per unit area (Yao, Rusong et al. 2012). CS is the change in the ecosystem service  
192 value coefficient  $V_i$  of the ecosystem type  $i$  per unit area caused by a 1% change in  
193 the  $ESV$  of the total ecosystem service value in the study area.  $CS > 1$ , which indicates  
194 that  $ESV$  is elastic to  $V_i$  and the accuracy of  $V_i$  is low.  $CS < 1$ , it indicates that  $ESV$   
195 is inelastic to  $V_i$ , which indicates that  $V_i$  is more accurate and  $ESV$  estimation is



196 accurate. The value of the ecosystem service value of each ecosystem type is  
 197 increased or decreased by 50%, and the change of the elasticity coefficient of the total  
 198 value of ecosystem services is analyzed (Xiao-qing, Ze-xian et al. , Yao, Rusong et al.  
 199 2012). The calculation is as follows:

$$200 \quad CS = \left| \frac{(ESV_j - ESV_i)/ESV_i}{(VC_{jk} - VC_{ik})/VC_{ik}} \right|$$

201 Among them,  $ESV$  is the total value of ecosystem services in the study area.  $VC$   
 202 is the coefficient of ecosystem service value per unit area.  $A_i$  is the area of ecosystem  
 203 type in the study area.  $k$  is the  $k$ th service of the ecosystem.  $i$  and  $j$  are the adjusted  
 204 values of initial value and ecological value coefficient.

## 205 **2 Results**

206 2.1 Changes in total values of ecosystem services in Xishuangbanna from 1996 to  
 207 2016

208 2.1.1 ESV of different ecosystem types in Xishuangbanna from 1996 to 2016

209 According to calculations, the values of different ecosystem services from 1996  
 210 to 2016 are shown in Table 1.

211 Table 1 Ecosystem service values of each ecosystem type in Xishuangbanna from  
 212 1996 to 2016

|                  | 1996                              |       | 2003                              |       | 2010                              |       | 2016                              |       |
|------------------|-----------------------------------|-------|-----------------------------------|-------|-----------------------------------|-------|-----------------------------------|-------|
|                  | Value<br>(100<br>million<br>yuan) | %     | Value<br>(100<br>million<br>yuan) | %     | Value<br>(100<br>million<br>yuan) | %     | Value<br>(100<br>million<br>yuan) | %     |
| Forest Ecosystem | 583.2746                          | 82.23 | 561.6264                          | 79.99 | 460.6084                          | 67.23 | 427.0692                          | 66.77 |

|                           |          |         |          |         |          |         |          |         |
|---------------------------|----------|---------|----------|---------|----------|---------|----------|---------|
| Tea garden Ecosystem      | 4.2859   | 0.60    | 10.4002  | 1.48    | 8.584    | 1.25    | 22.522   | 3.52    |
| Cultivated Land Ecosystem | 6.1635   | 0.87    | 4.5839   | 0.65    | 5.6547   | 0.83    | 9.6756   | 1.51    |
| Watershed Ecosystem       | 3.1857   | 0.45    | 2.8703   | 0.41    | 2.5494   | 0.37    | 3.7308   | 0.58    |
| Rubber Ecosystem          | 114.3118 | 16.12   | 124.7308 | 17.77   | 209.0921 | 30.52   | 178.7769 | 27.95   |
| Construction Ecosystem    | -1.8814  | -0.27   | -2.0961  | -0.30   | -1.3601  | -0.20   | -2.1648  | -0.34   |
| Total                     | 709.3401 | 100.00% | 702.1154 | 100.00% | 685.1285 | 100.00% | 639.6097 | 100.00% |

213

214           Among the ESV of different ecosystem types in Xishuangbanna, the ecological  
 215 value coefficients of forest ecosystems and rubber ecosystems are high. Changes in  
 216 the area of such ecosystems will greatly affect the changes in ecosystem service  
 217 values in Xishuangbanna.

218           From Table 1, it can be concluded that the ESV of Xishuangbanna in 1996, 2003,  
 219 2010, and 2016 showed a continuous decrease, which reflects that the ability of  
 220 Xishuangbanna ecosystem to provide services to human beings has been continuously  
 221 decreasing. The values of Xishuangbanna ecosystem services in 1996, 2003, 2010,  
 222 and 2016 were 70.4014billion yuan, 70.2115 billion yuan, 68.5129 billion yuan and  
 223 63.6098 billion yuan, respectively. The total value shows a continuous decreasing  
 224 trend, reflecting the continuous decline in the ability of the Xishuangbanna ecosystem  
 225 to provide services to humans.

226           Among them, in terms of the proportion of ecosystem service value, the forest  
 227 land ecosystem has the highest proportion, which is the most important component of  
 228 the ESV in Xishuangbanna (66.77% -82.23%), followed by rubber ecosystem (16.12%  
 229 -30.52%). Xishuangbanna is an area with high forest coverage, and the ecological  
 230 environment is generally well preserved. However, with the development of human

231 society and economy, the ecosystem services in Xishuangbanna show a continuous  
232 decline. In the case where the forest land and rubber ecosystem in Xishuangbanna  
233 account for a large proportion, the ESV of the forest land ecosystem and rubber  
234 ecosystem accounts for 94.71% -98.35% of the total value. It can also be seen that  
235 woodland and rubber ecosystems dominate the ecosystem services in Xishuangbanna.

236 The construction land ecosystem is the lowest and has a negative value, and the  
237 service value of the construction land ecosystem continues to show negative growth,  
238 from -6.6847 billion yuan in 1996 to -7.6916 billion yuan, which is also in line with  
239 the reality of the increasing area of construction land.

240 According to research, the ESV of rubber in Xishuangbanna is far less than that  
241 of tropical rain forests and secondary vegetation (67.149 million yuan / (hm<sup>2</sup>.a) ), the  
242 proportion of which is about 56.74%. The ecological service value of evergreen  
243 coniferous forest (13,315 yuan / (hm<sup>2</sup>.a)) is large(Gaodi, Chunxia et al. 2003). The  
244 service value of the rubber forest ecosystem in Xishuangbanna is far greater than the  
245 average value of tropical forests in China (16.056 million yuan / (hm<sup>2</sup>.a)) (Yuanzhao  
246 2003). The ecological and economic value of rubber forests is only about half of the  
247 value of tropical rain forests and secondary vegetation. Cutting down tropical rain  
248 forests and planting rubber forests is not desirable from the total regional ecological  
249 and economic value, which is not conducive to regional natural asset appreciation and  
250 local sustainable development(Tiyuan, Jiayong et al. 2009).

251 The direct economic output of rubber forest is much larger than that of tropical  
252 rain forest. This is the source of huge economic pressure on tropical rain forest  
253 protection. It is recommended to adopt environmental and economic policies such as  
254 ecological compensation to comprehensively protect tropical rain forest(Tiyuan,  
255 Jiayong et al. 2009).

256 2.1.2 Changes in ESV of different ecosystem types in Xishuangbanna from 1996

257 to 2016

258 The total reduction of ESV from 2010 to 2016 (16.17153 billion yuan) was  
259 630.19% of the total reduction of ESV from 1996 to 2003, which is the time period  
260 when ESV changes the most. During 2010-2016, the rapid development of  
261 urbanization, the continuous decline in rubber prices, the rise in the prices of tea and  
262 crops, and the continuous advancement of the country's policy of “returning rubber to  
263 forests” have made the value of the Xishuangbanna ecosystem the most significant.  
264 Total reduction in ESV from 2003 to 2010 (6.03301 billion yuan). The period from  
265 1996 to 2003 was the smallest total reduction in ESV (2.556614 billion yuan).

266 The ESV of forest ecosystems continues to decline. The change of forest  
267 ecosystem ESV is the most dramatic change among all ecosystem types, from 82.23%  
268 of the total ESV in 1996 to 66.77% of the total ESV in 2016. The period when the  
269 ESV of forestland ecosystem changed the most was from 2003 to 2010. During this  
270 period, especially from 2003 to 2007, the continuous increase of rubber prices in the  
271 world has caused a large number of forest land ecosystems to be replaced by rubber  
272 ecosystems. The rubber ecosystem ESV has increased sharply and the forest land  
273 ecosystem ESV has decreased sharply. The total reduction in ESV of forest land  
274 ecosystem from 2003 to 2010 (35.87842 billion yuan) is 64.67% of the total reduction  
275 from 1996 to 2016 (55.49324 billion yuan).

276 The ESV of the tea garden ecosystem decreased first, then increased sharply, and  
277 increased overall. From 2003 to 2010, the ESV of the tea garden ecosystem decreased.  
278 During this period, the tea price in Xishuangbanna was low, and rubber was the main  
279 source of the local economy. From 2010 to 2016, the tea market in Xishuangbanna  
280 was opened. The prices of tea, especially those of several famous tea mountains, rose

281 sharply, and the ESV (4.995 billion yuan) of the tea garden ecosystem increased  
282 sharply.

283 The ESV of cultivated land ecosystem showed a trend of first decline, then slow  
284 increase, and overall growth. The ESV of cultivated land ecosystem decreased by  
285 56106 million yuan from 1996 to 2003, and continued to increase from 2003 to 2010  
286 and from 2010 to 2016. Among them, the biggest change was from 2010 to 2016. The  
287 total increase in ESV of forest land ecosystem (1.42819 billion yuan) from 2010 to  
288 2016 was 114.49% of the total increase of ESV of forest land ecosystem (1.224746  
289 billion yuan) from 1996 to 2016.

290 The ESV of water ecosystems are decreasing first, then increasing, and generally  
291 increasing slowly.

292 2.2 Changes of total values in single ecosystem service in Xishuangbanna from 1996  
293 to 2016

294 2.2.1 ESV in the individual ecosystem services in Xishuangbanna from 1996 to  
295 2016

296 It can be seen from Table 2 that among the various ESVs in Xishuangbanna, soil  
297 formation and protection account for the largest proportion (17.86% -17.93%),  
298 followed by air regulation (accounting for 15.80% -15.92%) and biodiversity  
299 protection (accounting for 14.86% -14.91%), water conservation (accounting for  
300 14.48% -14.57%), climate regulation (accounting for 12.34% -12.35%), raw material  
301 production (accounting for 11.61% -11.78%), and food production accounting for the  
302 smallest proportion (accounting for Than 0.56% -0.70%).

303 Compared with urban areas with low forest coverage, this ranking result is quite  
304 different. For example, in the study of urban ecosystem service value, hydrological  
305 regulation accounts for the largest proportion in various ESVs(Hui, Wenwu et al.

306 2017, Tianhai, field et al. 2018). The second largest proportion is waste treatment and  
 307 biodiversity maintenance (Hui, Wenwu et al. 2017, Tianhai, field et al. 2018).

308

309 Table 2 Evaluation of ecosystem service of different types in Xishuangbanna from  
 310 1996 to 2016

|                                  | 1996                              |        | 2003                              |        | 2010                              |        | 2016                              |        |
|----------------------------------|-----------------------------------|--------|-----------------------------------|--------|-----------------------------------|--------|-----------------------------------|--------|
|                                  | Value<br>(100<br>million<br>yuan) | %      | Value<br>(100<br>million<br>yuan) | %      | Value<br>(100<br>million<br>yuan) | %      | Value<br>(100<br>million<br>yuan) | %      |
| Food production                  | 4.1512                            | 0.59   | 3.9549                            | 0.56   | 4.0058                            | 0.59   | 4.4911                            | 0.70   |
| Raw material                     | 83.4826                           | 11.77  | 82.6823                           | 11.78  | 80.5464                           | 11.76  | 74.2826                           | 11.61  |
| Air regulation                   | 112.8175                          | 15.90  | 111.8080                          | 15.92  | 108.9442                          | 15.90  | 101.0697                          | 15.80  |
| Climate<br>regulation            | 87.5521                           | 12.34  | 86.7146                           | 12.35  | 84.5643                           | 12.34  | 78.9300                           | 12.34  |
| Water<br>conservation            | 103.2227                          | 14.55  | 101.9738                          | 14.52  | 99.8082                           | 14.57  | 92.6174                           | 14.48  |
| Waste treatment                  | 44.4557                           | 6.27   | 43.7798                           | 6.24   | 42.9431                           | 6.27   | 41.5826                           | 6.50   |
| Soil formation<br>and protection | 126.6771                          | 17.86  | 125.5667                          | 17.88  | 122.4488                          | 17.87  | 114.7029                          | 17.93  |
| Biodiversity<br>conservation     | 105.6038                          | 14.89  | 104.6699                          | 14.91  | 101.9862                          | 14.89  | 95.0425                           | 14.86  |
| Recreation and<br>culture        | 41.3773                           | 5.83   | 40.9656                           | 5.83   | 39.8816                           | 5.82   | 36.8908                           | 5.77   |
| Total                            | 709.3401                          | 100.00 | 702.1154                          | 100.00 | 685.1285                          | 100.00 | 639.6097                          | 100.00 |

311

312 The essence of ESV change is the area change of different ecosystems and the  
 313 difference of equivalent factors in different ecosystems. Therefore, the trend of the



|                     |                               |          |          |          |          |        |        |        |        |
|---------------------|-------------------------------|----------|----------|----------|----------|--------|--------|--------|--------|
| Supply services     | Food production               | 4.1512   | 3.9549   | 4.0058   | 4.4911   | 2.72   | -0.30  | -1.07  | -0.49  |
| Supply services     | Raw material                  | 83.4826  | 82.6823  | 80.5464  | 74.2826  | 11.08  | 12.57  | 13.76  | 13.19  |
| Regulation services | Air regulation                | 112.8175 | 111.8080 | 108.9442 | 101.0697 | 13.97  | 16.86  | 17.30  | 16.85  |
| Regulation services | Climate regulation            | 87.5521  | 86.7146  | 84.5643  | 78.9300  | 11.59  | 12.66  | 12.38  | 12.36  |
| Regulation services | Water conservation            | 103.2227 | 101.9738 | 99.8082  | 92.6174  | 17.29  | 12.75  | 15.80  | 15.21  |
| Regulation services | Waste treatment               | 44.4557  | 43.7798  | 42.9431  | 41.5826  | 9.36   | 4.93   | 2.99   | 4.12   |
| Support services    | Soil formation and protection | 126.6771 | 125.5667 | 122.4488 | 114.7029 | 15.37  | 18.36  | 17.02  | 17.17  |
| Support services    | Biodiversity conservation     | 105.6038 | 104.6699 | 101.9862 | 95.0425  | 12.93  | 15.80  | 15.25  | 15.15  |
| Cultural services   | Recreation and culture        | 41.3773  | 40.9656  | 39.8816  | 36.8908  | 5.70   | 6.38   | 6.57   | 6.43   |
| Total               |                               | 709.3401 | 702.1154 | 685.1285 | 639.6097 | 100.00 | 100.00 | 100.00 | 100.00 |

329

330 2.2.3 Changes in the value of individual ecosystem services in different  
 331 administrative regions of Xishuangbanna from 1996 to 2016

332 An analysis of the ecosystem service value of the three counties (Figure 2) shows  
 333 that Xishuangbanna has higher ESV values in Erhai County and Mengla County.  
 334 Xishuangbanna's urban construction is dominated by Jinghong City (the seat of the  
 335 state government), and tourism in Jinghong City is developing rapidly. Erhai County  
 336 is not suitable for planting rubber, and the proportion of the tea garden ecosystem is



337 relatively large. It is the main tea production place in Xishuangbanna.

338

339

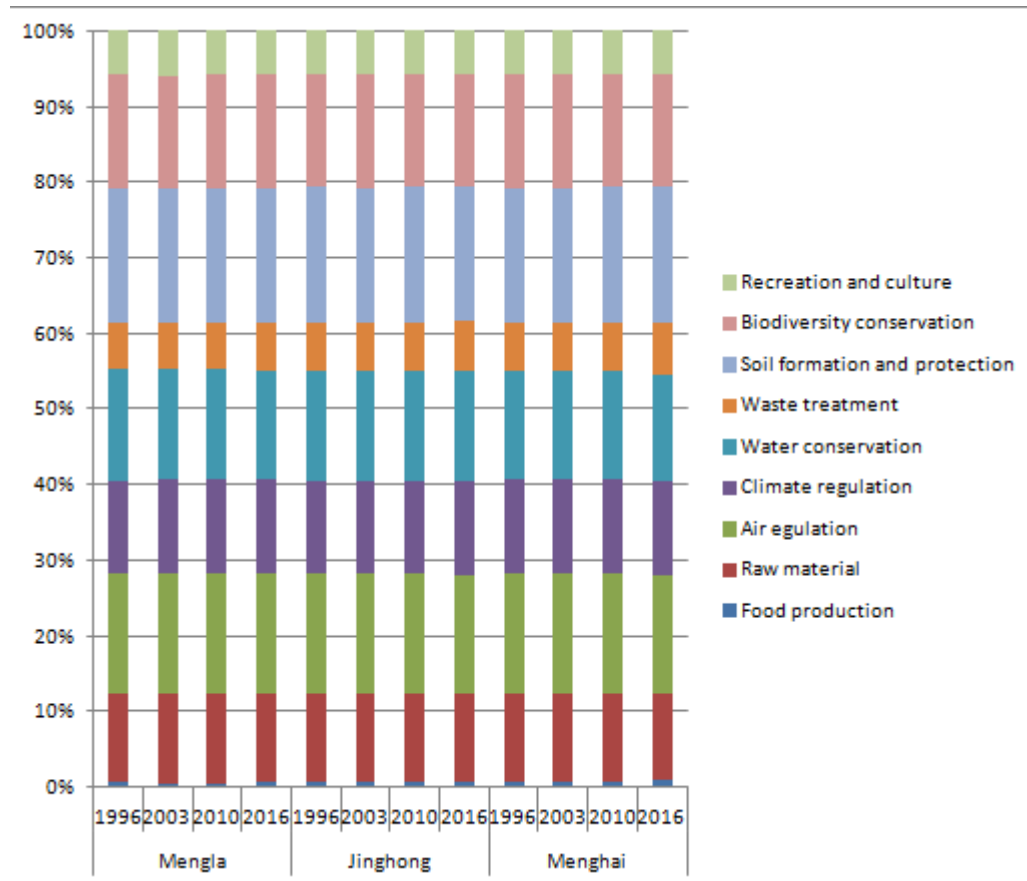

340

341 Figure 2 Changes in the value of individual ecosystem services in different  
342 administrative regions of Xishuangbanna from 1996 to 2016

343

### 344 2.3 Spatiotemporal changes of ESV in Xishuangbanna

345 As can be seen from the figure 3, there are obvious spatial differences and  
346 temporal changes in ESV in Xishuangbanna. In 1996, land with an ESV in  
347 Xishuangbanna of more than 3,000 yuan / ha accounted for more than 90% of the  
348 total area. The ESV value was the highest in the year. ESV dropped in 2003, mainly  
349 at 1000-2000 yuan / ha. In 2010, ESV rose, but the area was larger than 3,000 yuan /  
350 ha in 1996, and the change was mainly concentrated in Erhai County. The area of

351 ESV 1000-2000 yuan / ha in Erhai County increased. In 2016, ESV became more  
352 complicated and fragmented. High ESV areas were concentrated in Jinghong City and  
353 Mengla County, while Erhai County had fewer high ESV areas.

354

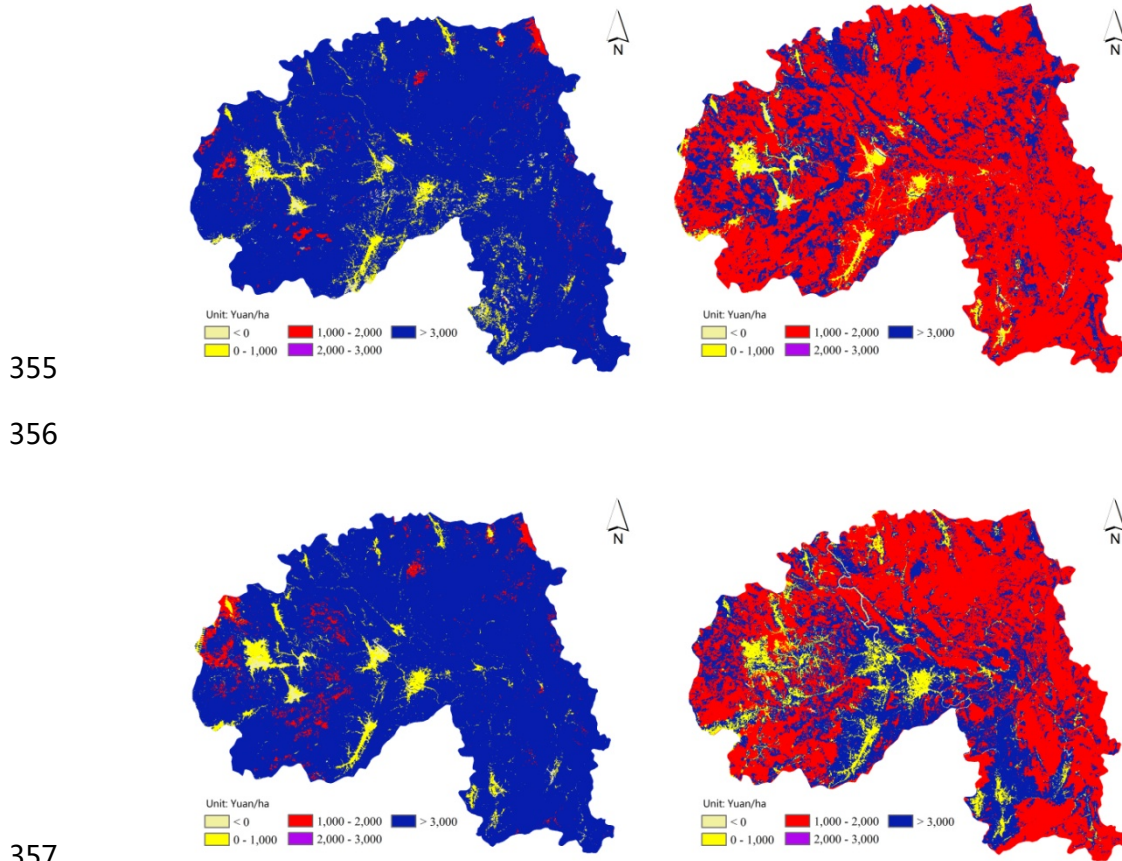

355

356

357

358

359 Figure3. Spatiotemporal changes of ESV in Xishuangbanna from 1996 to 2016

#### 360 2.4 Ecosystem services sensitivity analyses

361 By calculation, the results of CS of all ecosystem types except forest in 1996,  
362 2003, 2010 and 2016 were all lower than 1. The equivalence factors used in the study  
363 appear credible and accurate. This shows that the elasticity of the value coefficient of  
364 ESV is good, and the estimation results of this study are credible.

#### 365 2.5 Cold and hot spot distribution of ESV in Xishuangbanna

366 Based on the Getis-Ord  $G_i^*$  tool in the spatial analysis module, cold and hot

367 spot identification was performed for the four ESVs of Xishuangbanna in 1996, 2003,  
368 2010, and 2016, and the spatial distribution of the high and low ESV agglomerations  
369 in the fourth phase of the study area was obtained. Compared with 1996, the area of  
370 high-value ESV accumulation in Xishuangbanna in 2003, 2010 and 2016 has been  
371 significantly reduced. The hot spots of ESV in 1996 were mainly distributed in  
372 Jinghong City and Mengla County. Cold spots are distributed in Erhai County. Since  
373 2003, 99% of cold spots have increased and hot spots have disappeared.  
374

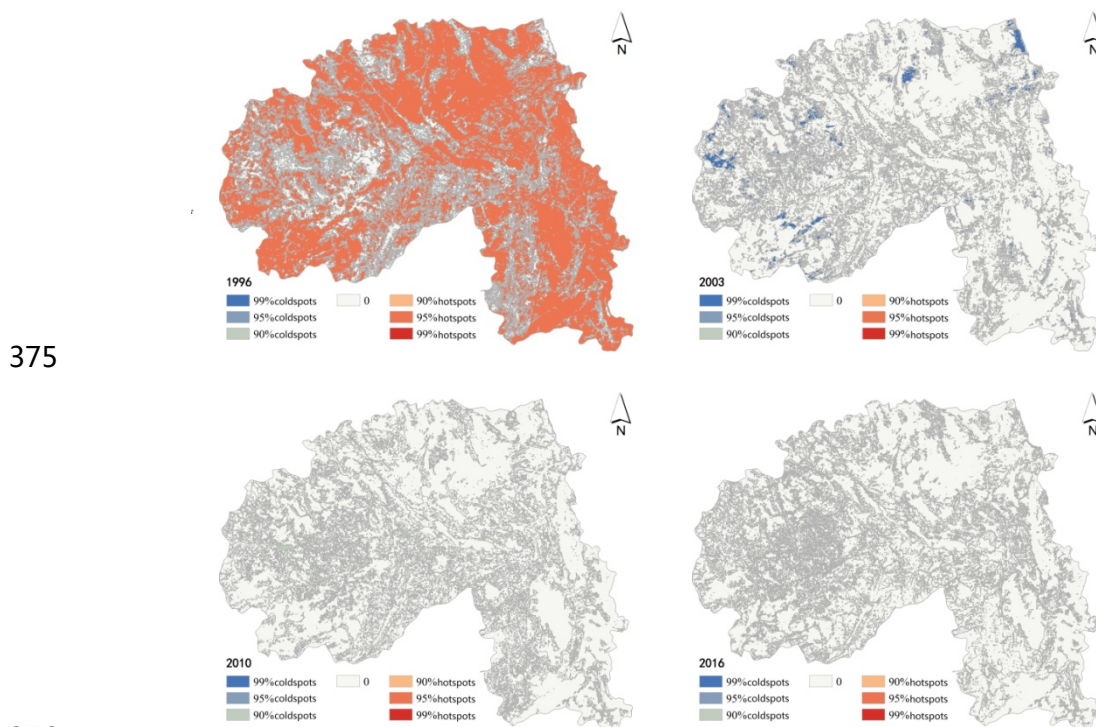

Figure4. Cold and hot spot distribution ofESV in Xishuangbanna from 1996 to 2016

### 378 3. Discussions and conclusions

379 (1) When evaluating regional ESV, most scholars directly used the Xie Gaudi and  
380 other Chinese terrestrial ecosystems per unit area ecological service value equivalent  
381 scale(Gaodi, Chunxia et al. 2003, Xiaosai, Yongming et al. 2015), and used national  
382 scale equivalent factors to evaluate ESV in counties and cities, without reflecting  
383 regional differences.

384 (2) During 1996-2016, the ESV in Xishuangbanna continued to decrease. In  
385 Xishuangbanna, due to the gradual decrease in the area of forest ecosystems, they  
386 have gradually been replaced by rubber, construction land, tea gardens, etc. in areas  
387 with low ecosystem service values. The overall value of ecosystem services in  
388 Xishuangbanna has continued to decline. As the forest land is the most important part  
389 of the ESV in Xishuangbanna, in the future development of Xishuangbanna, a  
390 corresponding ecological compensation system should be introduced to strengthen the  
391 protection of forest land, especially natural forests, and continue to promote the policy  
392 of “returning rubber to forests” to avoid excessive development and natural forest  
393 cover. The replacement of economic forests leads to ecological imbalances and  
394 ecological risks, and eventually triggers international ecological security issues.

395 (3) In this study, the ecological service value equivalent factor calculation method is  
396 used. Compared with other research results using the market value method, the  
397 calculation results are consistent, but the total value is smaller than the market value  
398 method (Zhaopeng and Youxin 2012) (Heli, Anyi et al. 2014).

399 (4) There are obvious spatial differences and temporal changes in ESV and hot and  
400 cold spots in Xishuangbanna. In 1996, land with an ESV in Xishuangbanna of more  
401 than 3,000 yuan / ha accounted for more than 90% of the total area. ESV dropped in  
402 2003, mainly at 1000-2000 yuan / ha. In 2010, ESV rose, and changes were mainly  
403 concentrated in Erhai County. The area of ESV 1000-2000 yuan / ha in Erhai County  
404 increased. In 2016, ESV became more complicated and fragmented. High ESV areas  
405 were concentrated in Jinghong City and Mengla County, while Erhai County had  
406 fewer high ESV areas. Compared with 1996, the area of high-value ESV  
407 accumulation in Xishuangbanna in 2003, 2010 and 2016 has been significantly  
408 reduced. The hot spots of ESV in 1996 were mainly distributed in Jinghong City and

409 Mengla County. Cold spots are distributed in Erhai County. Since 2003, 99% of cold  
410 spots have increased and hot spots have disappeared.

411 (5) The ESV assessment in this study is only for the first-class classification system,  
412 and there is no further subdivision of paddy fields and dry fields in cultivated land  
413 ecosystems, and there are woodlands and shrubs in woodland ecosystems.

## 414 **Implications for conservation**

## 415 **Acknowledgements**

416 Our special thanks go to Prof Yang Yuming and Prof Ye Wen for providing  
417 constructive suggestions.

## 418 **Declaration of Conflicting Interests**

419 The authors declared no potential conflicts of interests with respect to the  
420 research, authorship, and/or publication of this article.

## 421 **Funding**

422 This work was supported by the 2017 Yunnan Provincial Department of Education  
423 Science Research Foundation Project (Grant 2017ZZX210).

## 424 **References**

425 Alcamo, J. (2003). Ecosystems and human well-being: a framework for assessment,

426 Island Press.

427 Bottalico, F., L. Pesola, M. Vizzarri, L. Antonello, A. Barbati, G. Chirici, P. Corona, S.

428 Cullotta, V. Garfi and V. Giannico (2016). "Modeling the influence of alternative forest

429 management scenarios on wood production and carbon storage: A case study in the

- 430 Mediterranean region." Environmental research **144**: 72-87.
- 431 Braat, L. C. and R. de Groot (2012). "The ecosystem services agenda:bridging the  
432 worlds of natural science and economics, conservation and development, and public  
433 and private policy." Ecosystem Services **1**(1): 4-15.
- 434 Camacho-Valdez, V., A. Ruiz-Luna, A. Ghermandi, C. A. Berlanga-Robles and P. A. L. D.  
435 Nunes (2014). "Effects of Land Use Changes on the Ecosystem Service Values of  
436 Coastal Wetlands." Environmental Management **54**(4): 852-864.
- 437 Costanza, R., K. Chichakly, V. Dale, S. Farber, D. Finnigan, K. Grigg, S. Heckbert, I.  
438 Kubiszewski, H. Lee and S. Liu (2014). "Simulation games that integrate research,  
439 entertainment, and learning around ecosystem services." Ecosystem Services **10**:  
440 195-201.
- 441 Costanza, R., R. d'Arge, R. De Groot, S. Farber, M. Grasso, B. Hannon, K. Limburg, S.  
442 Naeem, R. V. O'neill and J. Paruelo (1997). "The value of the world's ecosystem services  
443 and natural capital." nature **387**(6630): 253-260.
- 444 Costanza, R., R. De Groot, P. Sutton, S. Van der Ploeg, S. J. Anderson, I. Kubiszewski, S.  
445 Farber and R. K. Turner (2014). "Changes in the global value of ecosystem services."  
446 Global environmental change **26**: 152-158.
- 447 Cui, Y., X. Xiao, Y. Zhang, J. Dong, Y. Qin, R. B. Doughty, G. Zhang, J. Wang, X. Wu and  
448 Y. Qin (2017). "Temporal consistency between gross primary production and  
449 solar-induced chlorophyll fluorescence in the ten most populous megacity areas over



- 450 years." *7*(1): 14963.
- 451 Danz, N. P., G. J. Niemi, R. R. Regal, T. Hollenhorst, L. B. Johnson, J. M. Hanowski, R. P.
- 452 Axler, J. J. H. Ciborowski, T. Hrabik and V. J. Brady (2007). "Integrated Measures of
- 453 Anthropogenic Stress in the U.S. Great Lakes Basin." *Environmental Management* **39**(5):
- 454 631-647.
- 455 De Groot, R., L. Brander, S. van der Ploeg, R. Costanza, F. Bernard, L. Braat, M. Christie,
- 456 N. Crossman, A. Ghermandi and L. Hein (2012). "Global estimates of the value of
- 457 ecosystems and their services in monetary units." *Ecosystem Services* **1**(1): 50-61.
- 458 Egoh, B. N., B. Reyers, M. Rouget and D. M. Richardson (2011). "Identifying priority
- 459 areas for ecosystem service management in South African grasslands." *Journal of*
- 460 *Environmental Management* **92**(6): 1642-1650.
- 461 Fei, L., Z. Shuwen, Y. Jiuchun, C. Liping, Y. Haijuan and B. Kun (2018). "Effects of land
- 462 use change on ecosystem services value in West Jilin since the reform and opening of
- 463 China." *Ecosystem Services* **31**: 12-20.
- 464 Fengqin, Yan, Shuwen, Zhang, Xingtuo, Liu, Dan, Chen, Jing and Chen (2016). "The
- 465 Effects of Spatiotemporal Changes in Land Degradation on Ecosystem Services Values
- 466 in Sanjiang Plain, China."
- 467 Gaodi, X., L. Chunxia, L. Yunfa, Z. Du and L. Shuangcheng (2003). "Ecological assets
- 468 valuation of the Tibetan Plateau." *Journal of Natural Resources* **18**(2): 189-196.
- 469 Heli, L., N. Anyi, Z. Jincai, L. Xiaowan and L. Xiaojing (2014). "Evaluation of ecosystem

- 470 services in Xishuangbanna based on land use change." Jiangsu Agricultural Science
- 471 **42**(5): 278-281.
- 472 Hui, W., Z. Wenwu, Z. Xiao and W. Xinzhi (2017). "Regional ecosystem service value
- 473 evaluation based on land use changes: A case study in Dezhou , Shandong Province ,
- 474 China." Acta Ecologica Sinica **37**(11): 3830-3839.
- 475 Kindu, M., T. Schneider, M. D?llerer, D. Teketay and T. Knoke (2016). "Scenario
- 476 modelling of land use/land cover changes in Munessa-Shashemene landscape of the
- 477 Ethiopian highlands." Science of the Total Environment **622-623**: 534-546.
- 478 Kuriqi, A., A. N. Pinheiro, A. Sordo-Ward and L. Garrote (2019). "Influence of
- 479 hydrologically based environmental flow methods on flow alteration and energy
- 480 production in a run-of-river hydropower plant." Journal of Cleaner Production **232**:
- 481 1028-1042.
- 482 Leverkus, A. B. and J. Castro (2017). "An ecosystem services approach to the ecological
- 483 effects of salvage logging: Valuation of seed dispersal." Ecological Applications.
- 484 Li, G., C. Fang and S. Wang (2016). "Exploring spatiotemporal changes in
- 485 ecosystem-service values and hotspots in China." Science of the Total Environment
- 486 **545**: 609-620.
- 487 MEA, M. E. A. (2005). "Ecosystems and human well-being: current state and trends."
- 488 Millennium Ecosystem Assessment, Global Assessment Reports.
- 489 Mensah, S., R. Veldtman, A. E. Assogbadjo, C. Ham, R. Glèlè Kaka? and T. Seifert (2017).



490 "Ecosystem service importance and use vary with socio-environmental factors: A study  
491 from household-surveys in local communities of South Africa." Ecosystem Services **23**:  
492 1-8.

493 Naidoo, R., A. Balmford, R. Costanza, B. Fisher, R. E. Green, B. Lehner, T. Malcolm and T.  
494 H. Ricketts (2008). "Global mapping of ecosystem services and conservation priorities."  
495 Proceedings of the National Academy of Sciences **105**(28): 9495-9500.

496 Ossola, A. and M. Hopton (2017). "Measuring tree loss dynamics across residential  
497 landscapes." **612**: 940-949.

498 Robards, M. D., M. L. Schoon, C. L. Meek and N. L. Engle (2011). "The importance of  
499 social drivers in the resilient provision of ecosystem services." Global Environmental  
500 Change **21**(2): 0-529.

501 Robert, Costanza, and, Ralph, d'Arge, and, Rudolf, de, Groot and and "The value of the  
502 world's ecosystem services and natural capital."

503 Robert, Costanza, and, Ralph, d'Arge, and, Rudolf, de, Groot and and (2005). "The  
504 value of the world's ecosystem services and natural capital."

505 Song, W. and X. Deng (2017). "Land-use/land-cover change and ecosystem service  
506 provision in China." Science of the Total Environment **576**: 705-719.

507 Storkey, J., T. Döring, J. Baddeley, R. Collins, S. Roderick, H. Jones and C. Watson (2015).  
508 "Engineering a plant community to deliver multiple ecosystem services." Ecological  
509 Applications **25**(4).

- 510 Sun, Z., Z. Liu, H. E. Chunyang, J. Wu and Technology (2016). "Multi-scale analysis of  
511 ecosystem service trade-offs in urbanizing drylands of China:A case study in the  
512 Hohhot-Baotou-Ordos-Yulin region." Acta Ecologica Sinica.
- 513 Tianhai, Z., field, X. Shu, T. Lina and G. Wei (2018). "The evolvement of land use  
514 patterns in coastal cities and its influence on ecosystem service values." Acta Ecologica  
515 Sinica **38**(21): 55-64.
- 516 Tiyan, X., W. Jiayong, D. Changqun and D. Liangjun (2009). "Ecological economic  
517 valuation of rubber plantation in Xishuangbanna." Journal of East China Normal  
518 University (Natural Science)(2): 27-34.
- 519 Xiao-qing, Z., G. Ze-xian and G. Xiang-yu "LAND USE AND LAND-COVER CHANGE  
520 AND IT' S IMPACT ON ECOSYSTEM SERVICES VALUES IN A REGION WITH  
521 LARGE-AREA ARTIFICIAL GARDENS." Resources and Environment in the Yangtze Basin  
522 **v.25**(01): 91-100.
- 523 Xiao-qing, Z., G. Ze-xian and G. Xiang-yu "LAND USE AND LAND-COVER CHANGE  
524 AND IT' S IMPACT ON ECOSYSTEM SERVICES VALUES IN A REGION WITH  
525 LARGE-AREA ARTIFICIAL GARDENS." Resources and Environment in the Yangtze Basin  
526 **v.25**(1): 91-100.
- 527 Xiaosai, L., Z. Yongming, Z. Li, T. Jingjing and L. Jing (2015). "Ecosystem services value  
528 change in Qinglong County from dynamically adjusted value coefficients." Chinese  
529 Journal of Eco-Agriculture **23**(3): 373-381.

- 530 Yang, J., Y. Guan, J. C. Xia, C. Jin and X. Li (2018). "Spatiotemporal variation  
531 characteristics of green space ecosystem service value at urban fringes: A case study  
532 on Ganjingzi District in Dalian, China." Science of the Total Environment **639**:  
533 1453-1461.
- 534 Yao, S., W. Rusong, W. K. House and Y. Wenrui (2012). "An analysis of the spatial and  
535 temporal changes in Chinese terrestrial ecosystem service functions." Chinese Science  
536 Bulletin(9): 42-53.
- 537 Yuanfan, Z., W. Qingzhong, T. Jing, H. Chaolang, S. Jingxin and Y. Dong (2010).  
538 "Evaluation of the values for ecological service function of tropical natural forest in  
539 Xishuangbanna." Forest Inventory and Planning **35**(1): 1-6.
- 540 Yuanzhao, H. (2003). "Distribution, Types and Characteristics of China's Tropical  
541 Forest." World Forestry Research **16**(3): 47-51.
- 542 Zhaopeng, J. and M. Youxin (2012). "Dynamic evaluation on ecosystem service values  
543 of Xishuangbanna, Yunnan, China." Journal of Central South University of Forestry  
544 &Technology **9**(32): 87-93.
- 545

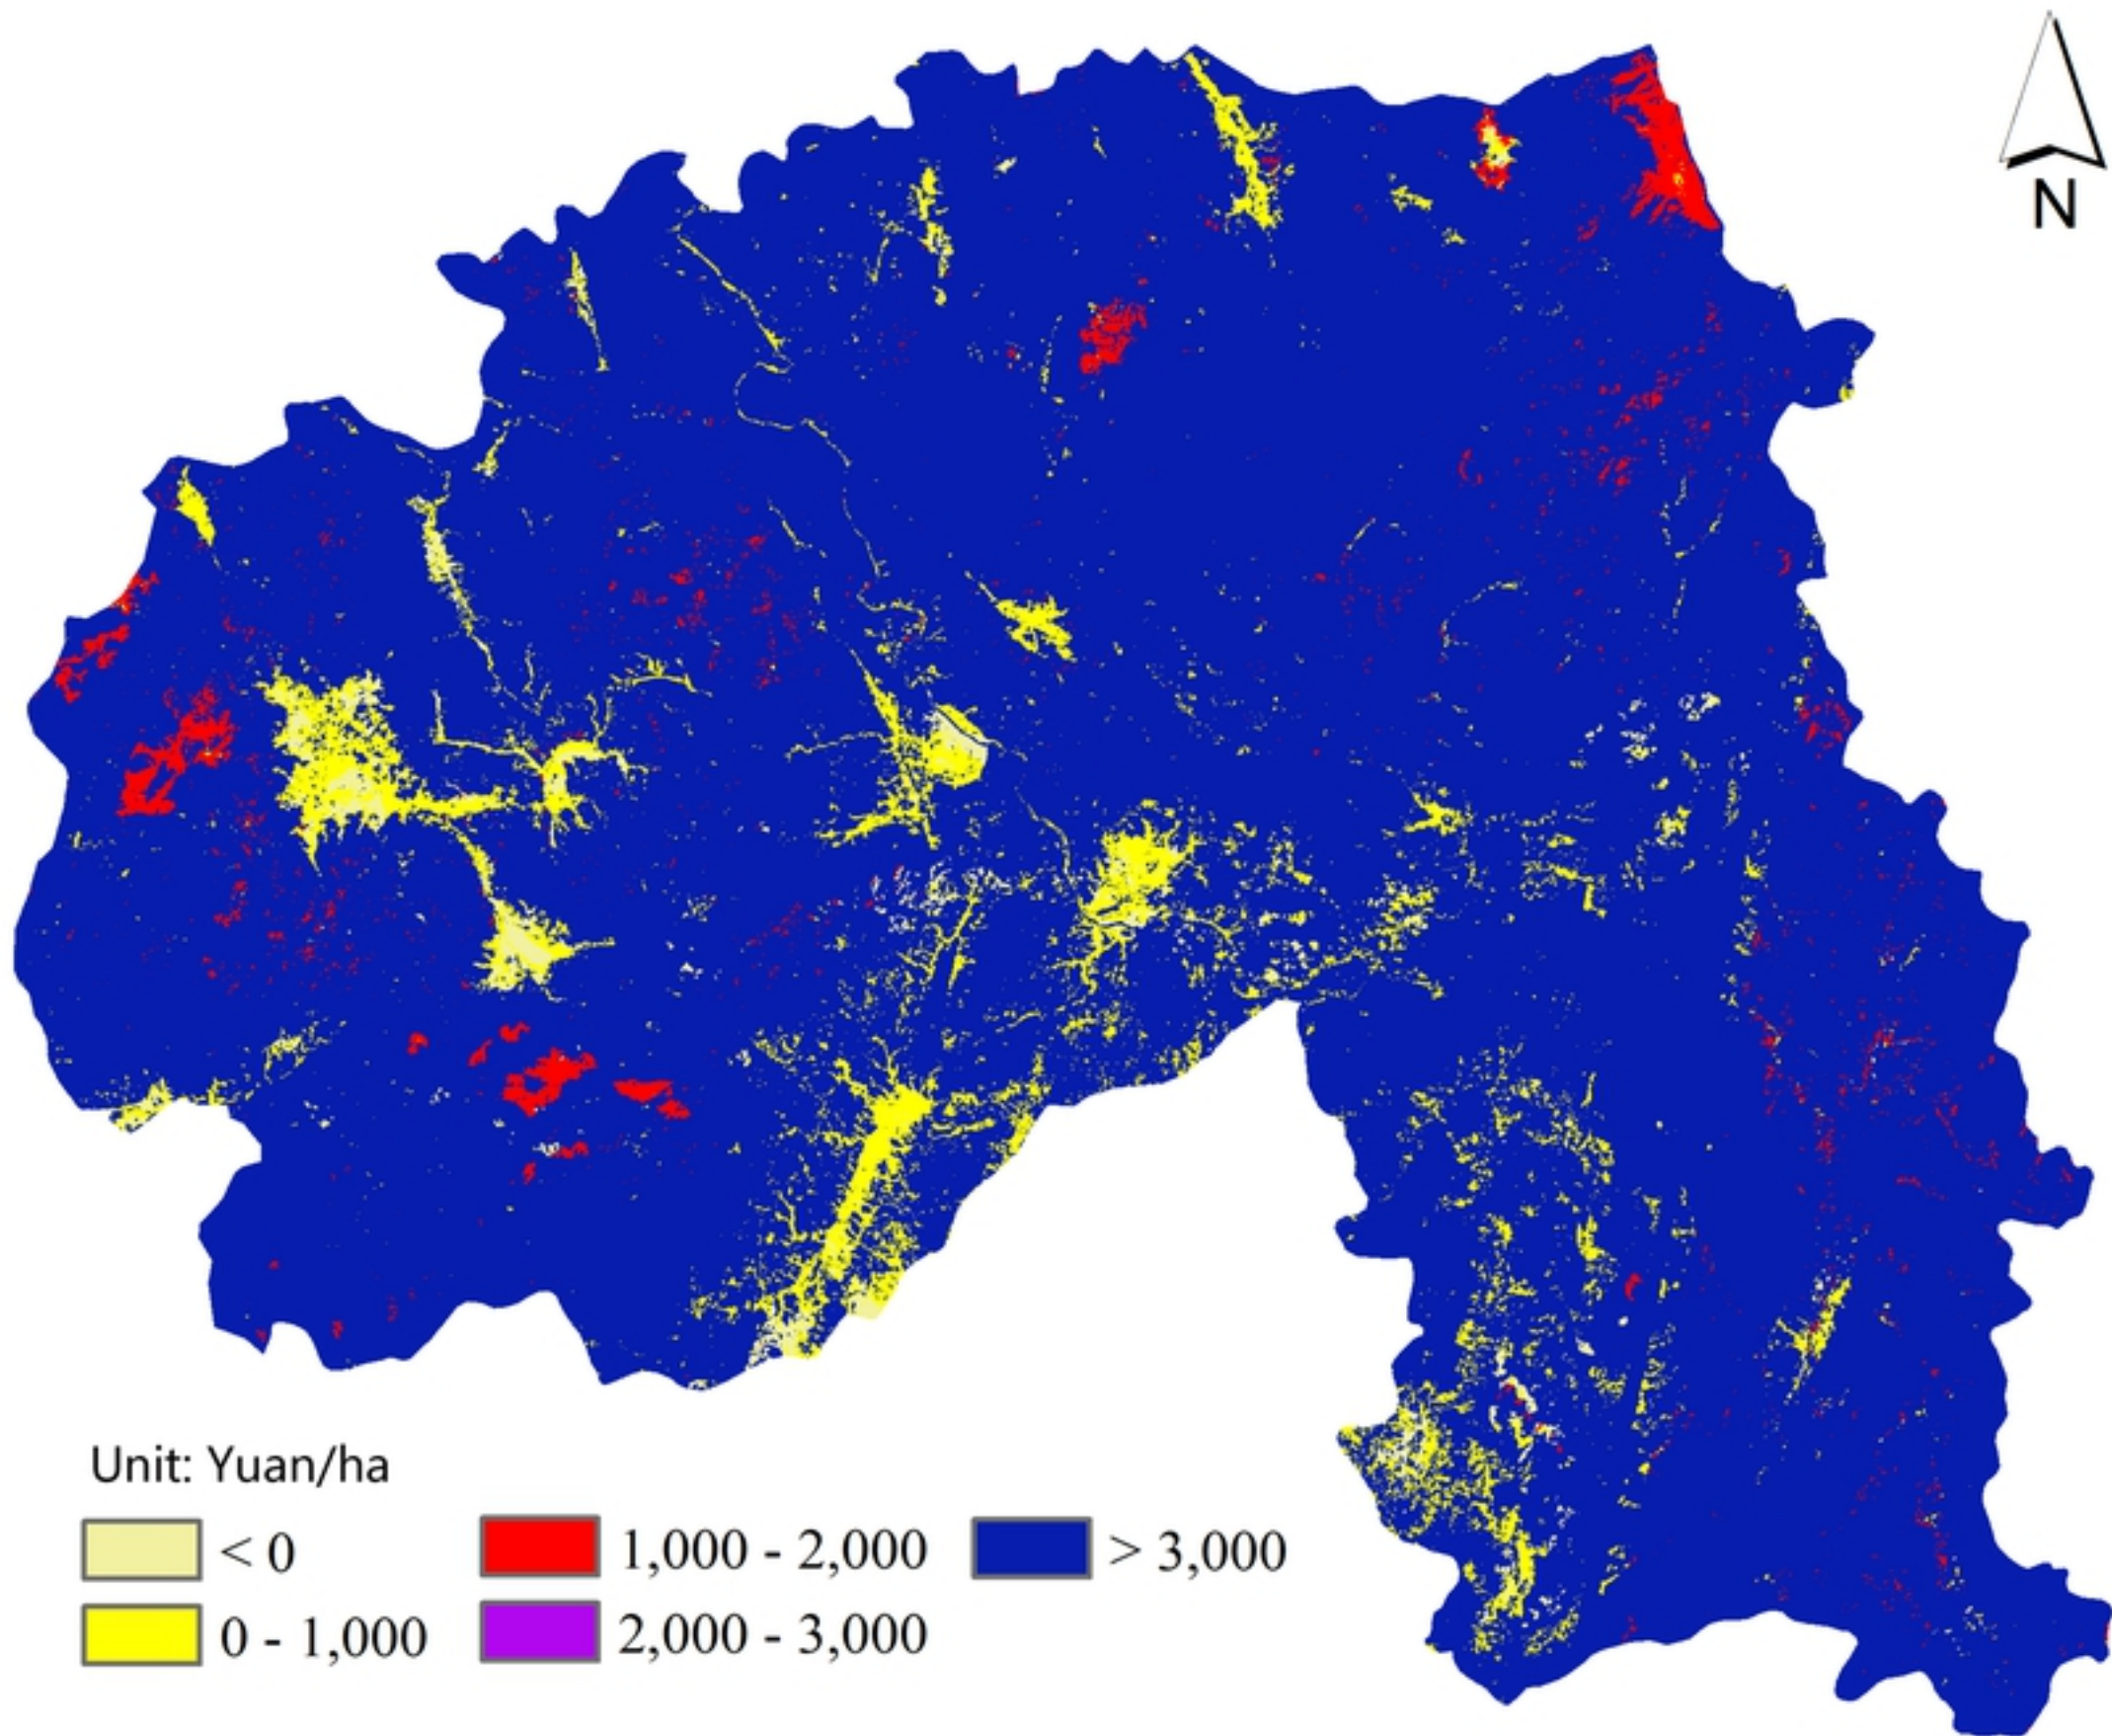



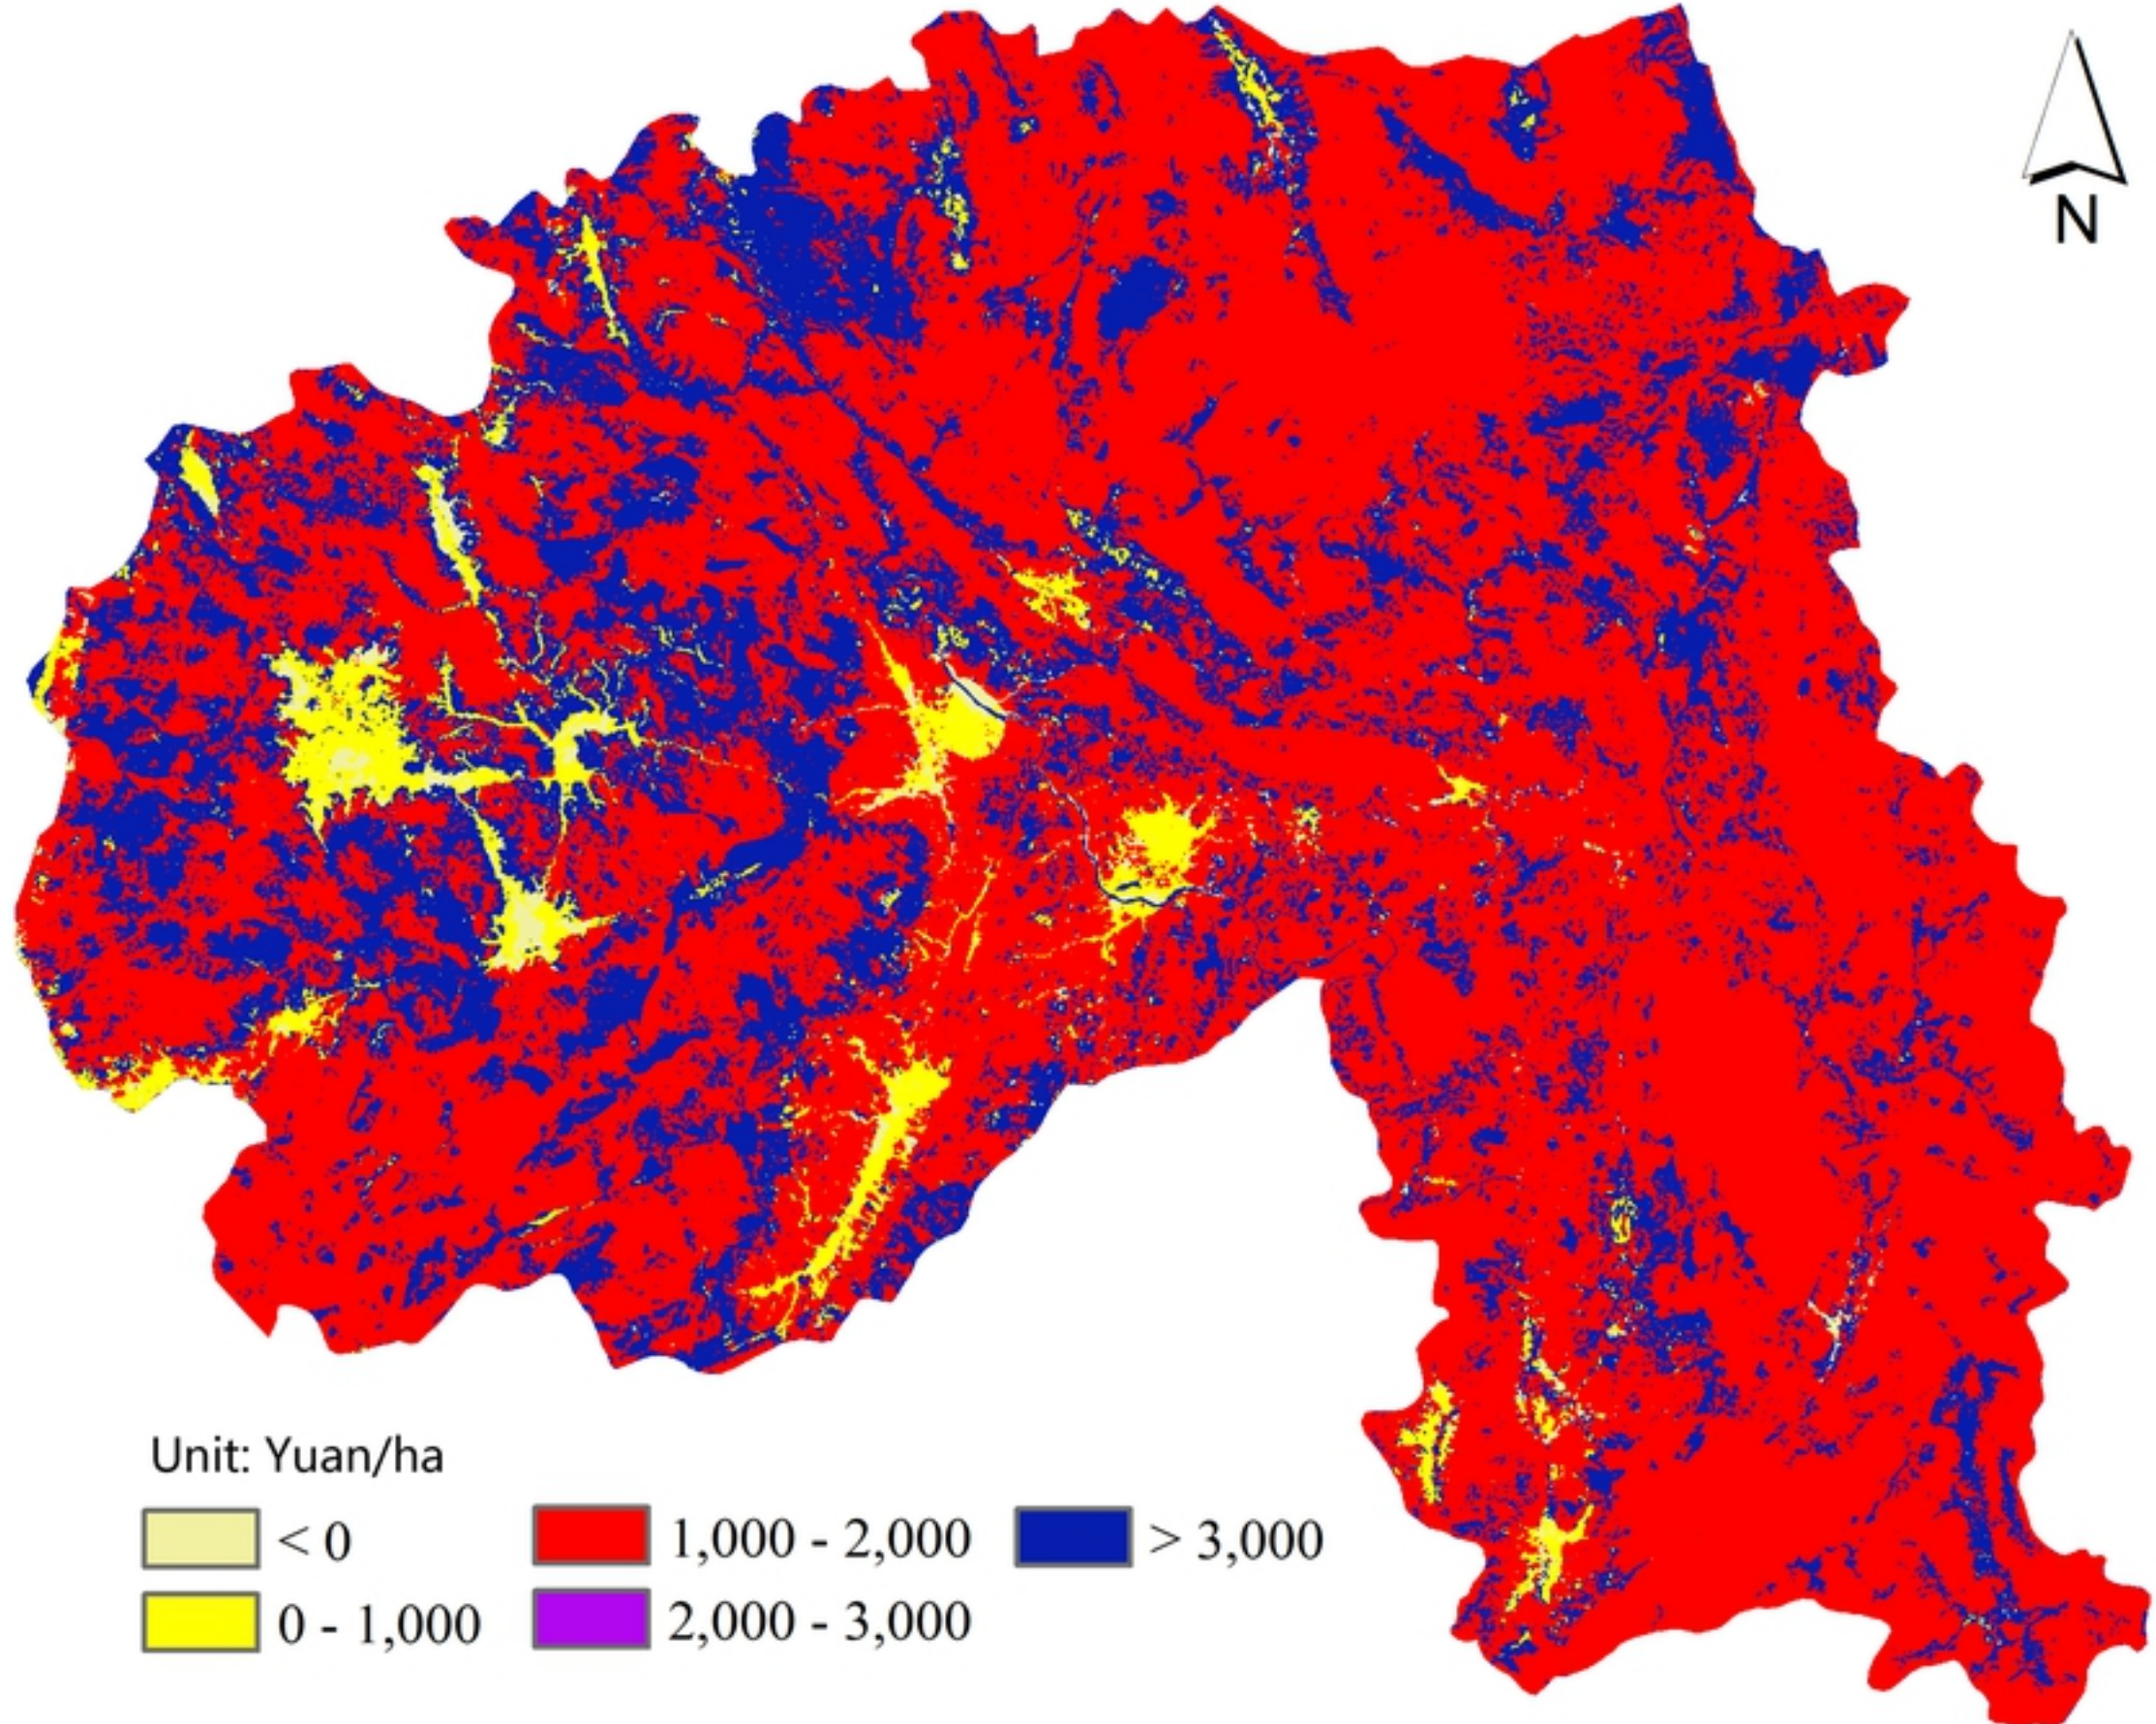



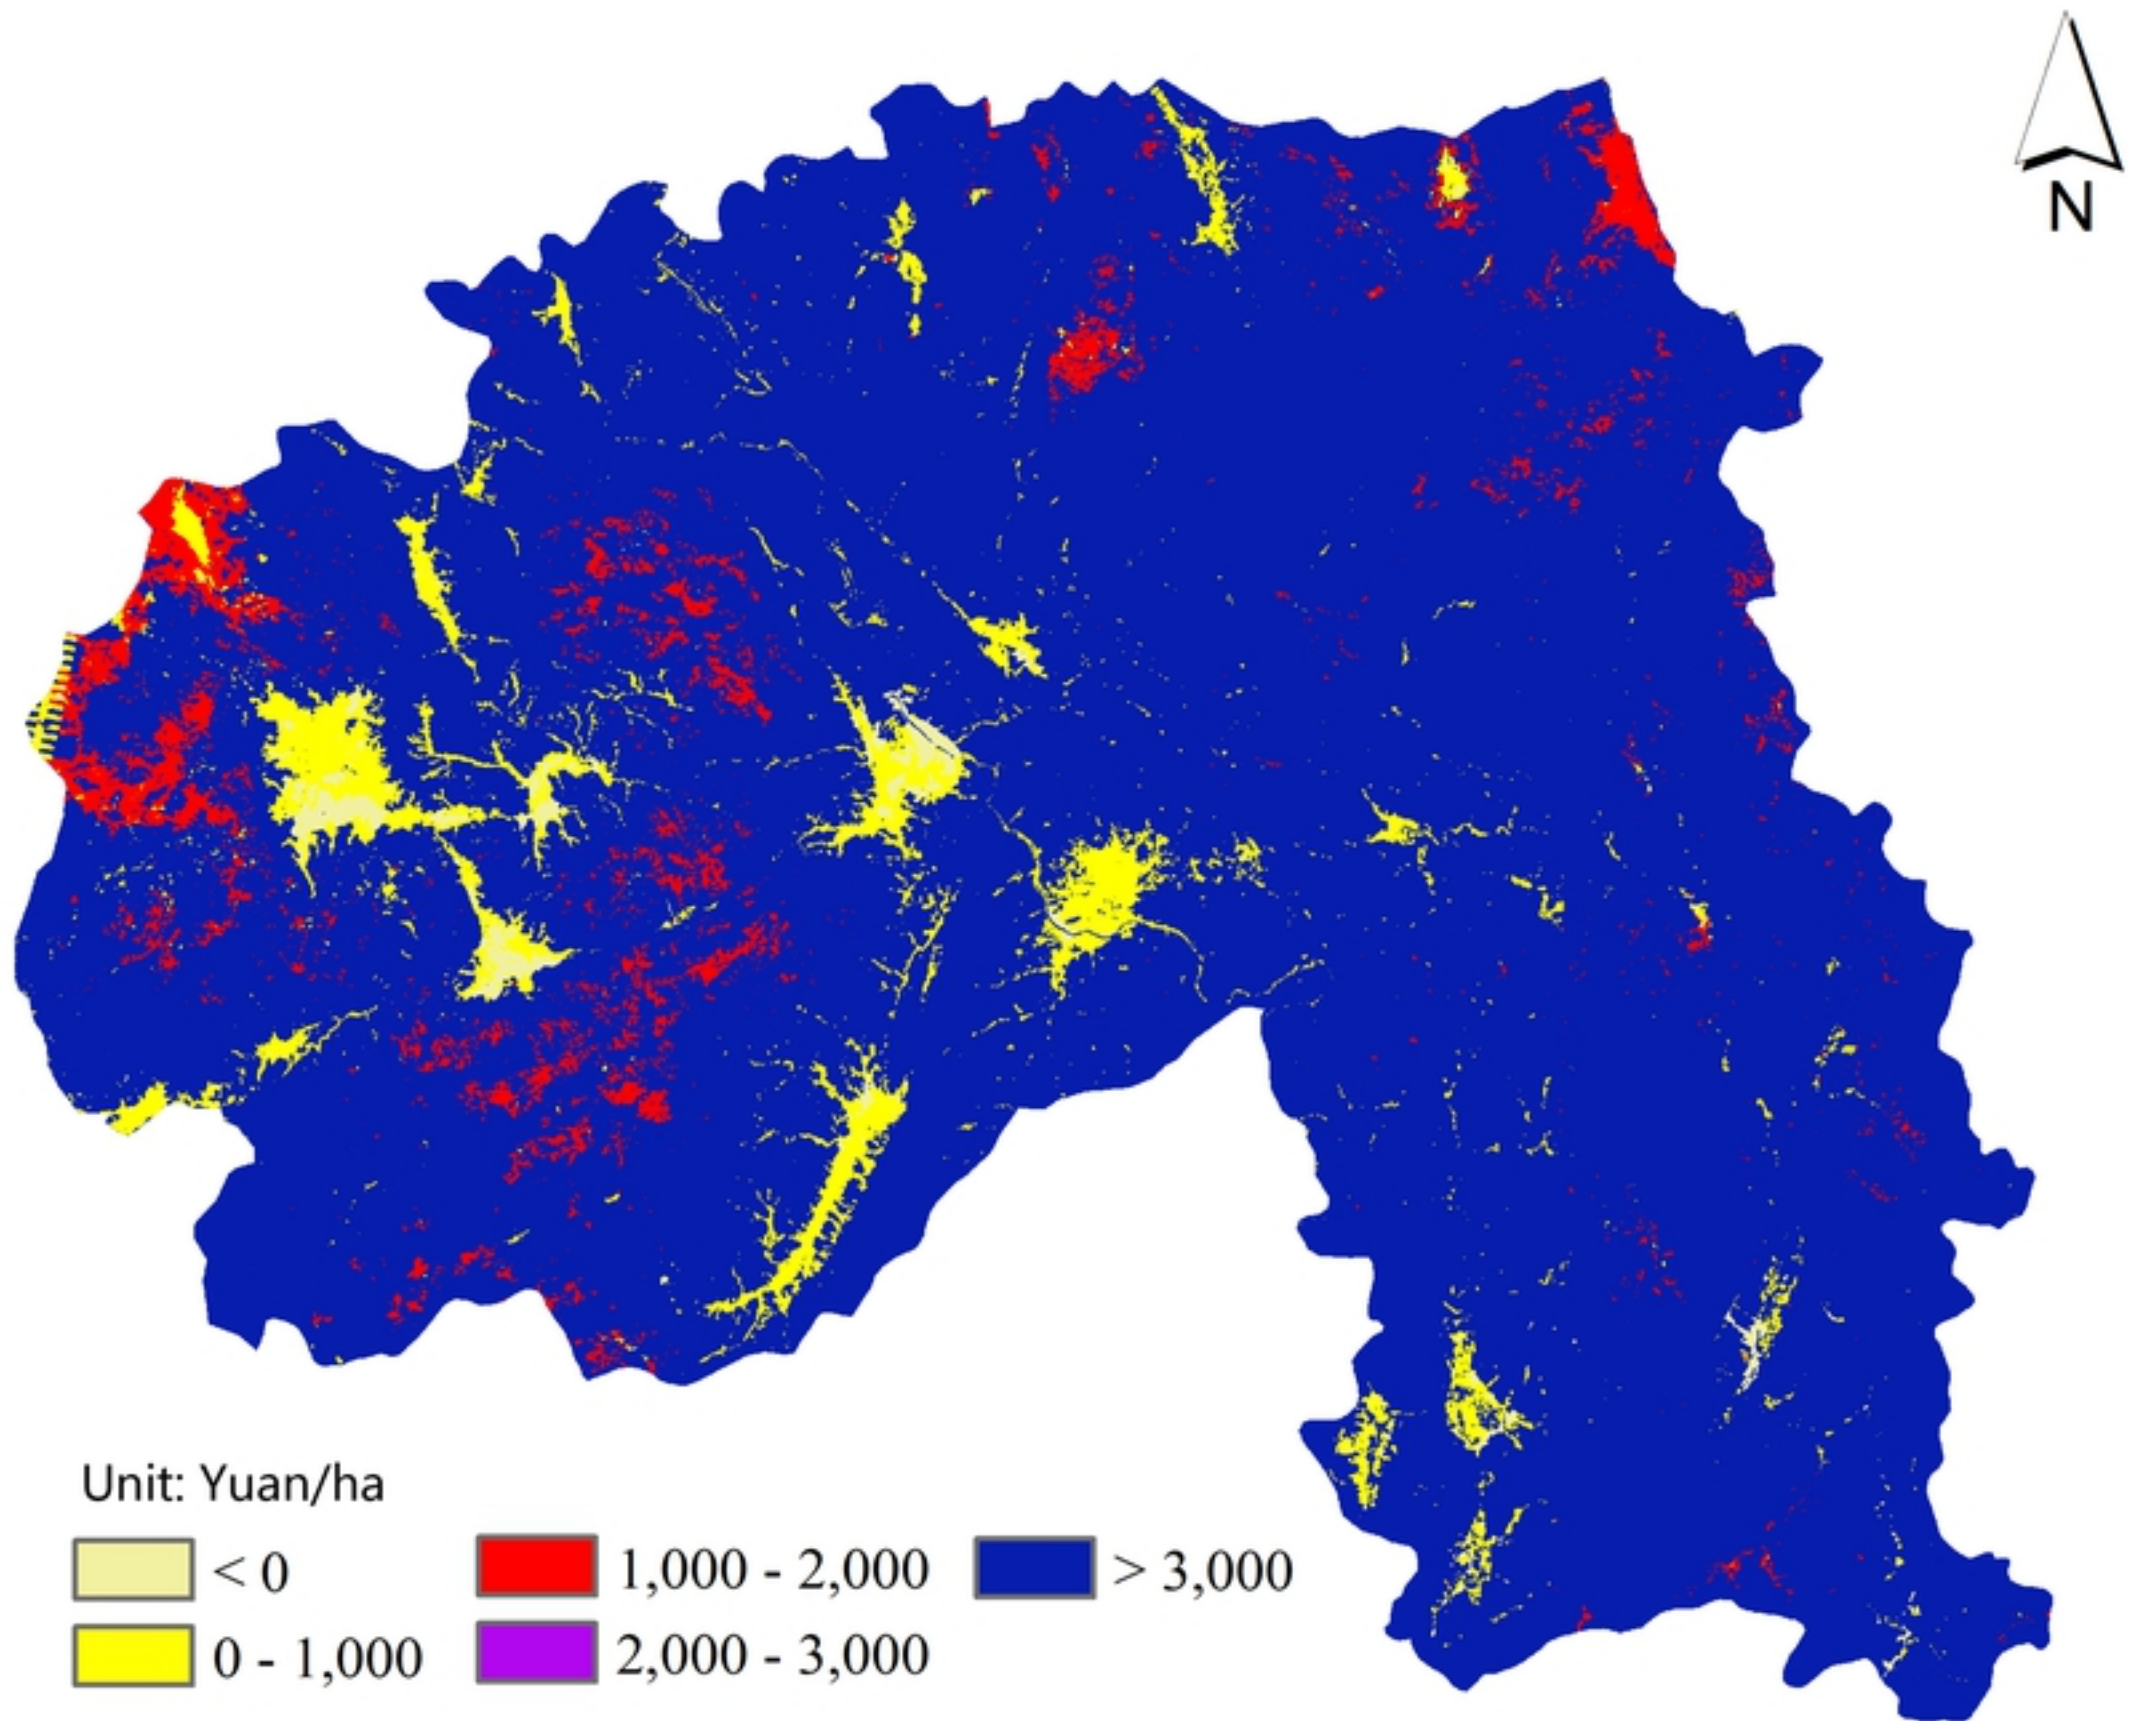



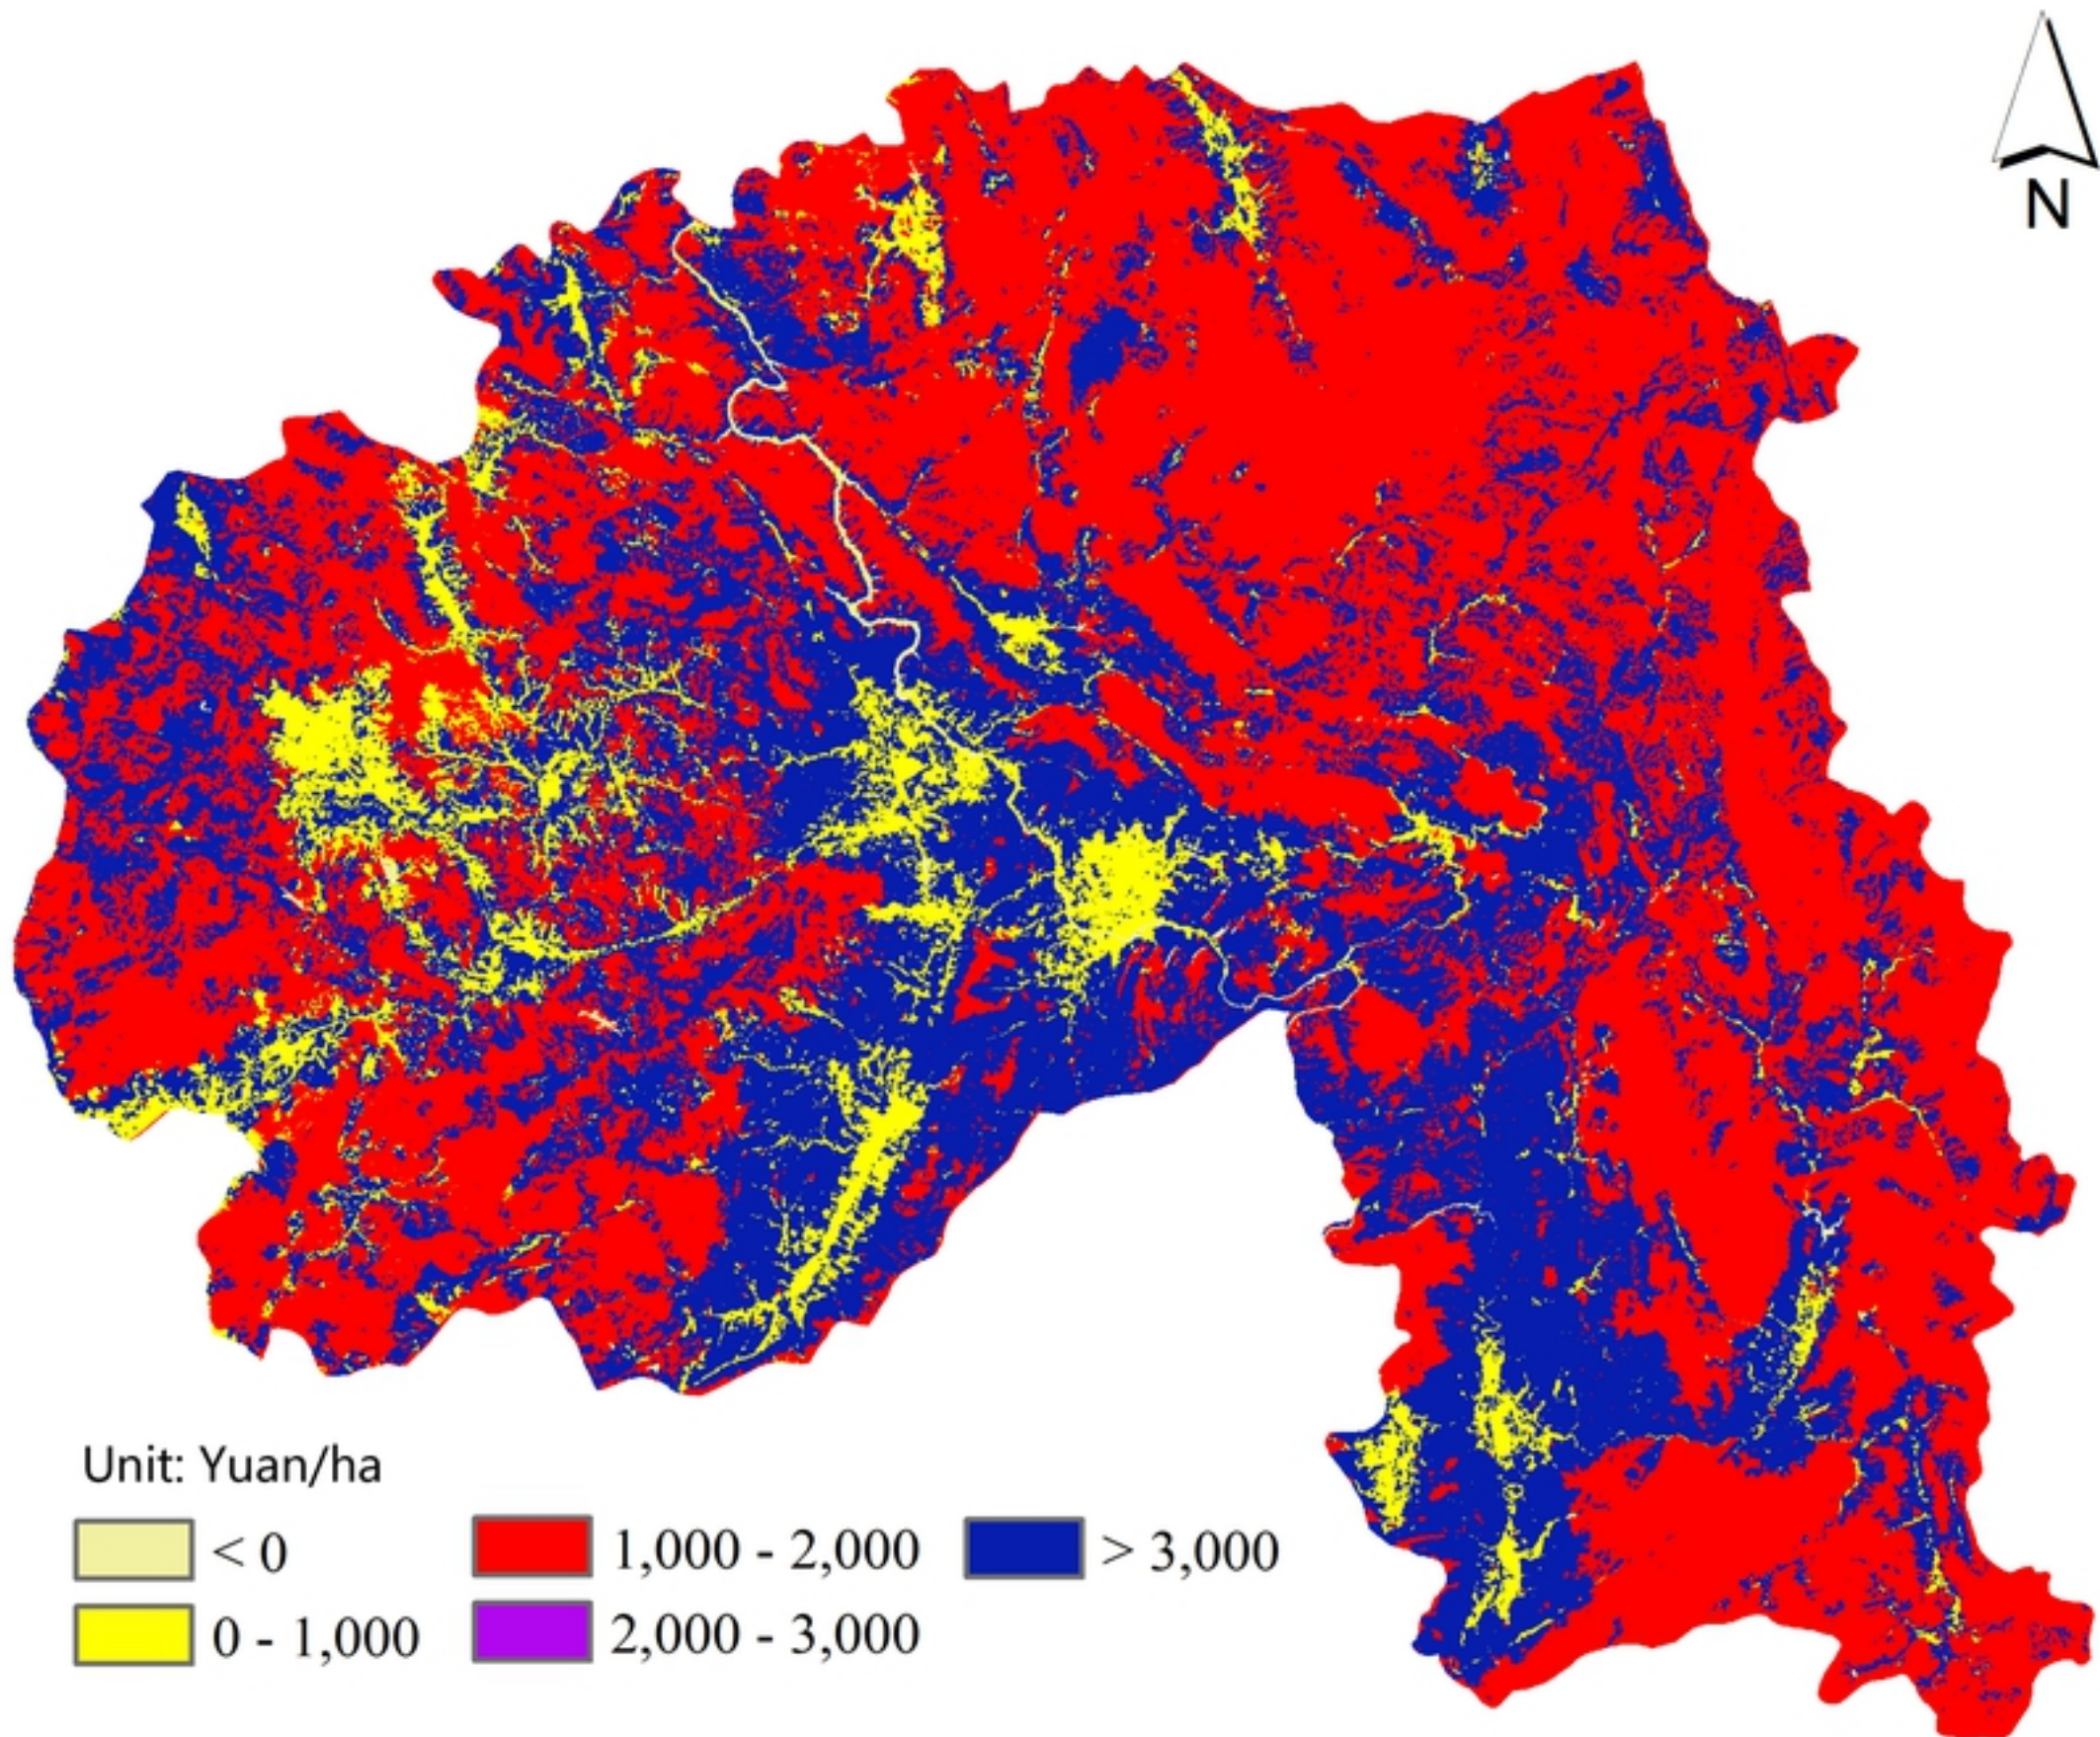



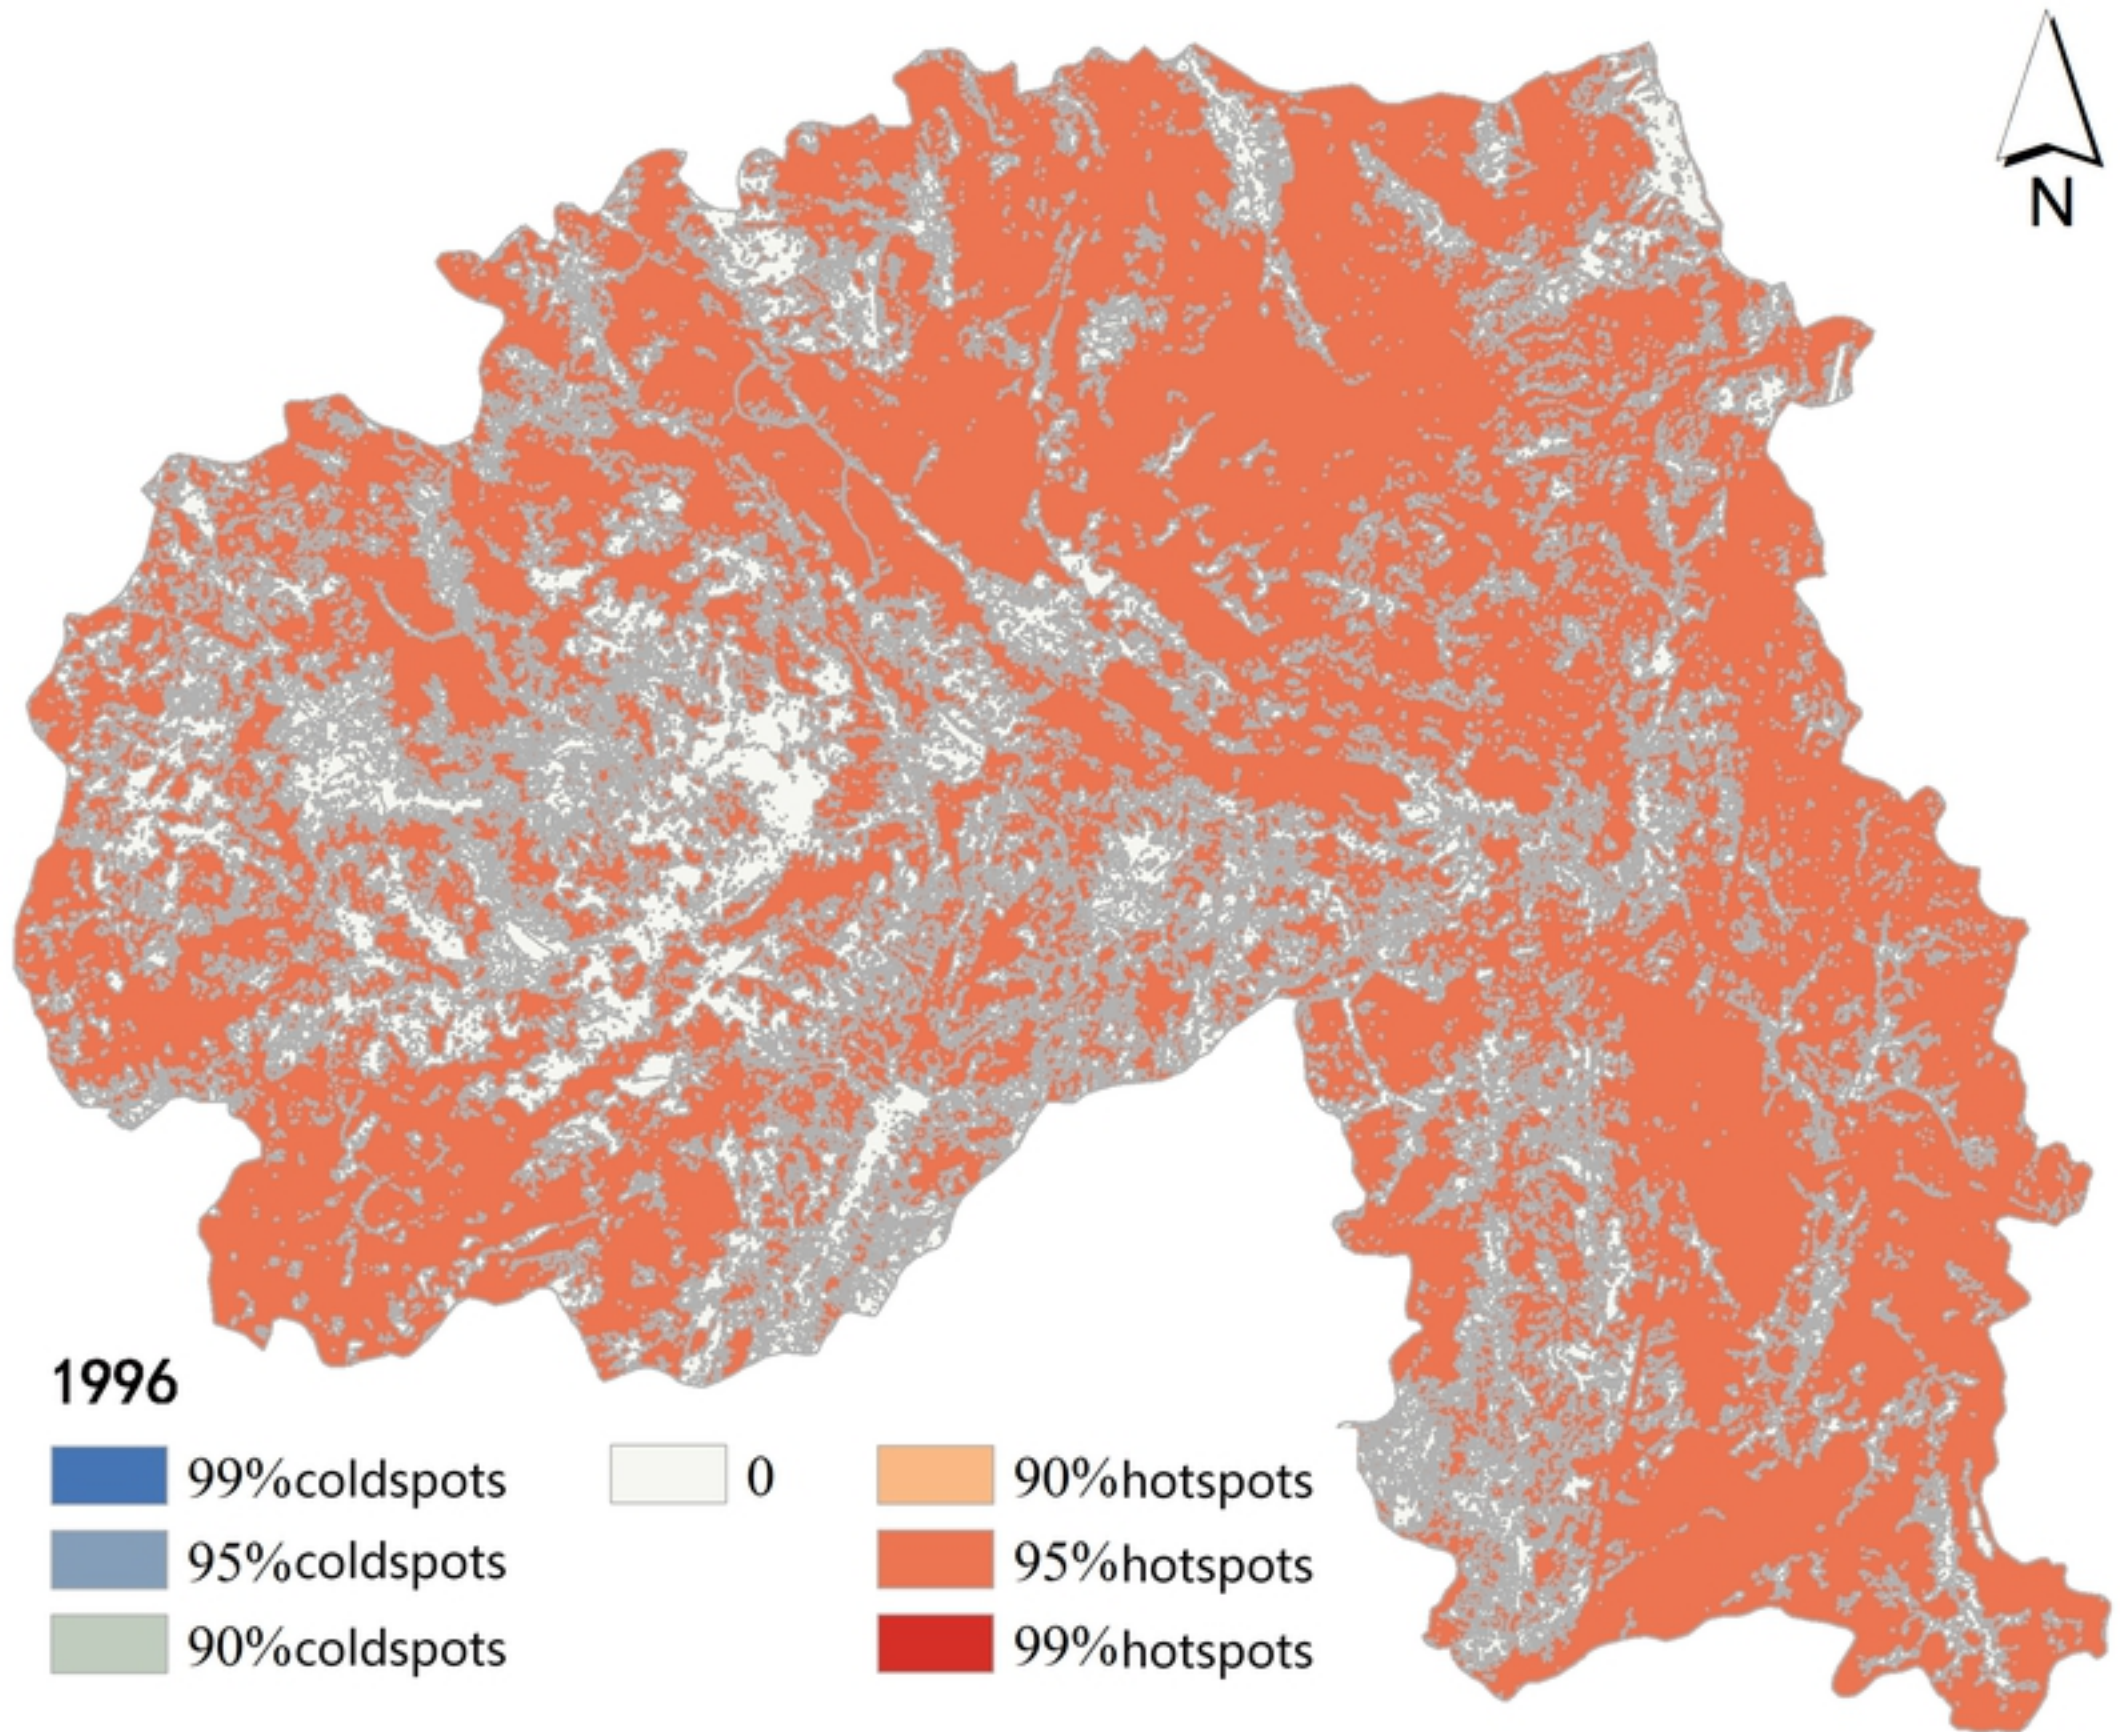



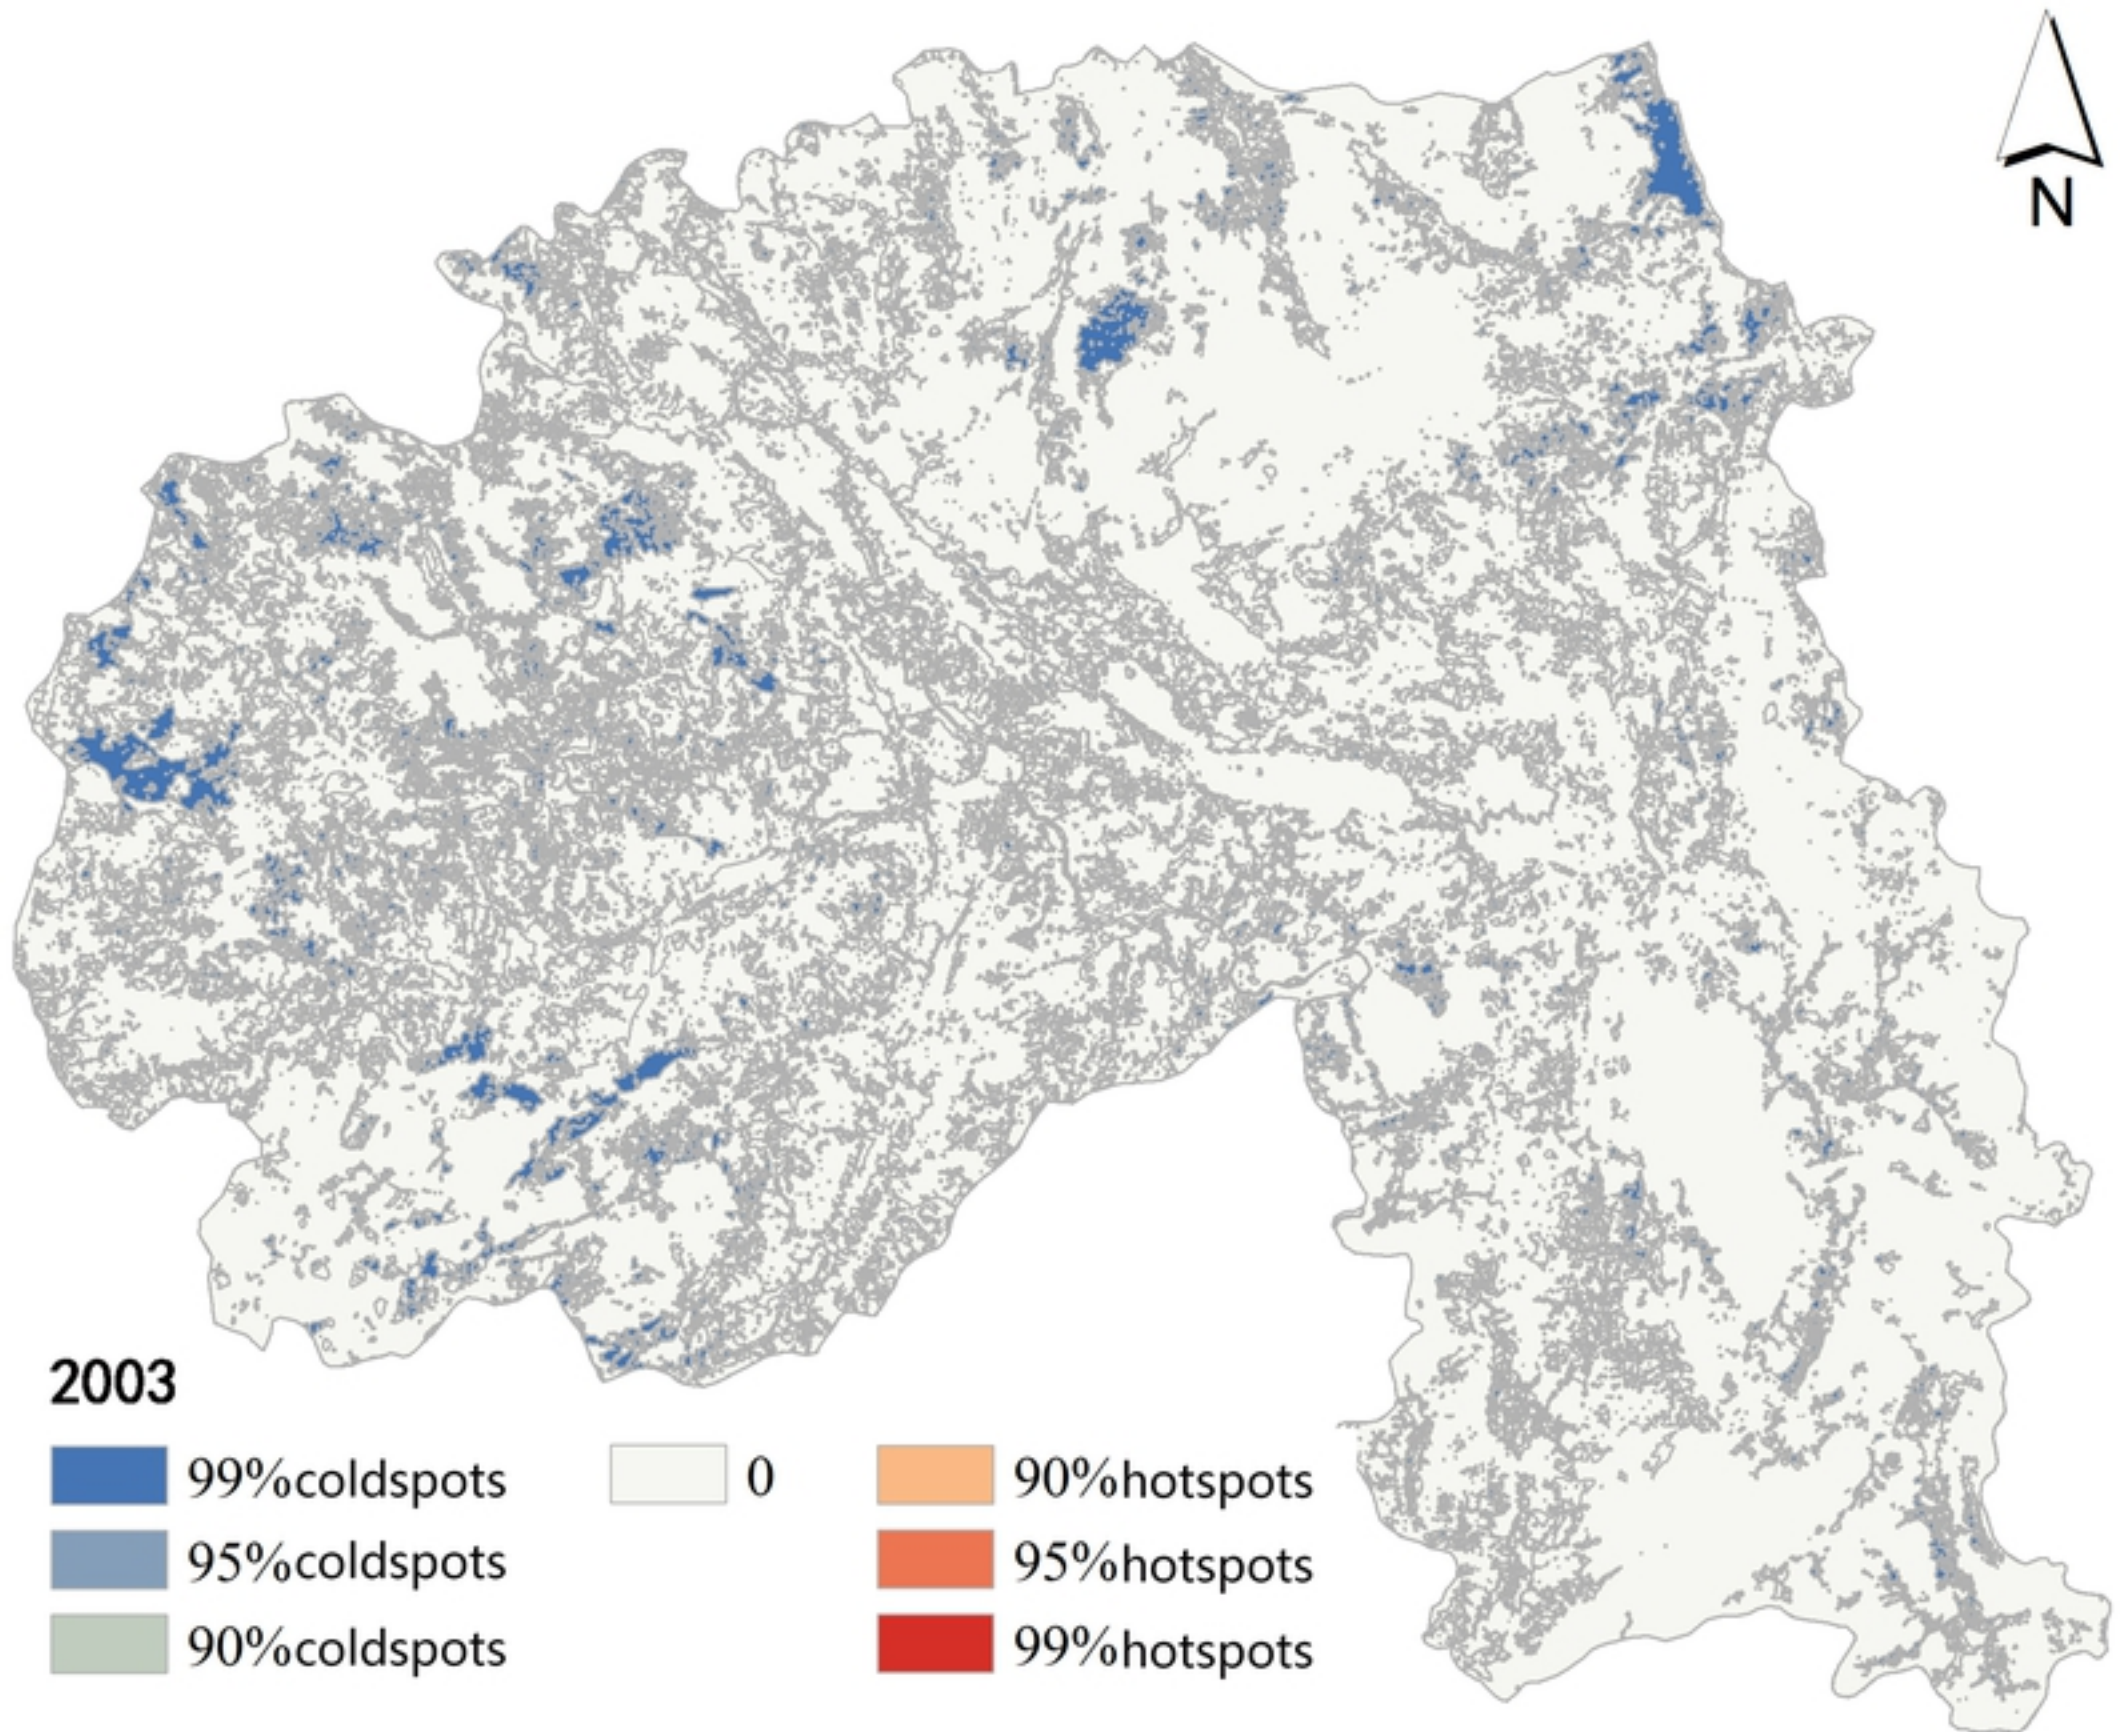



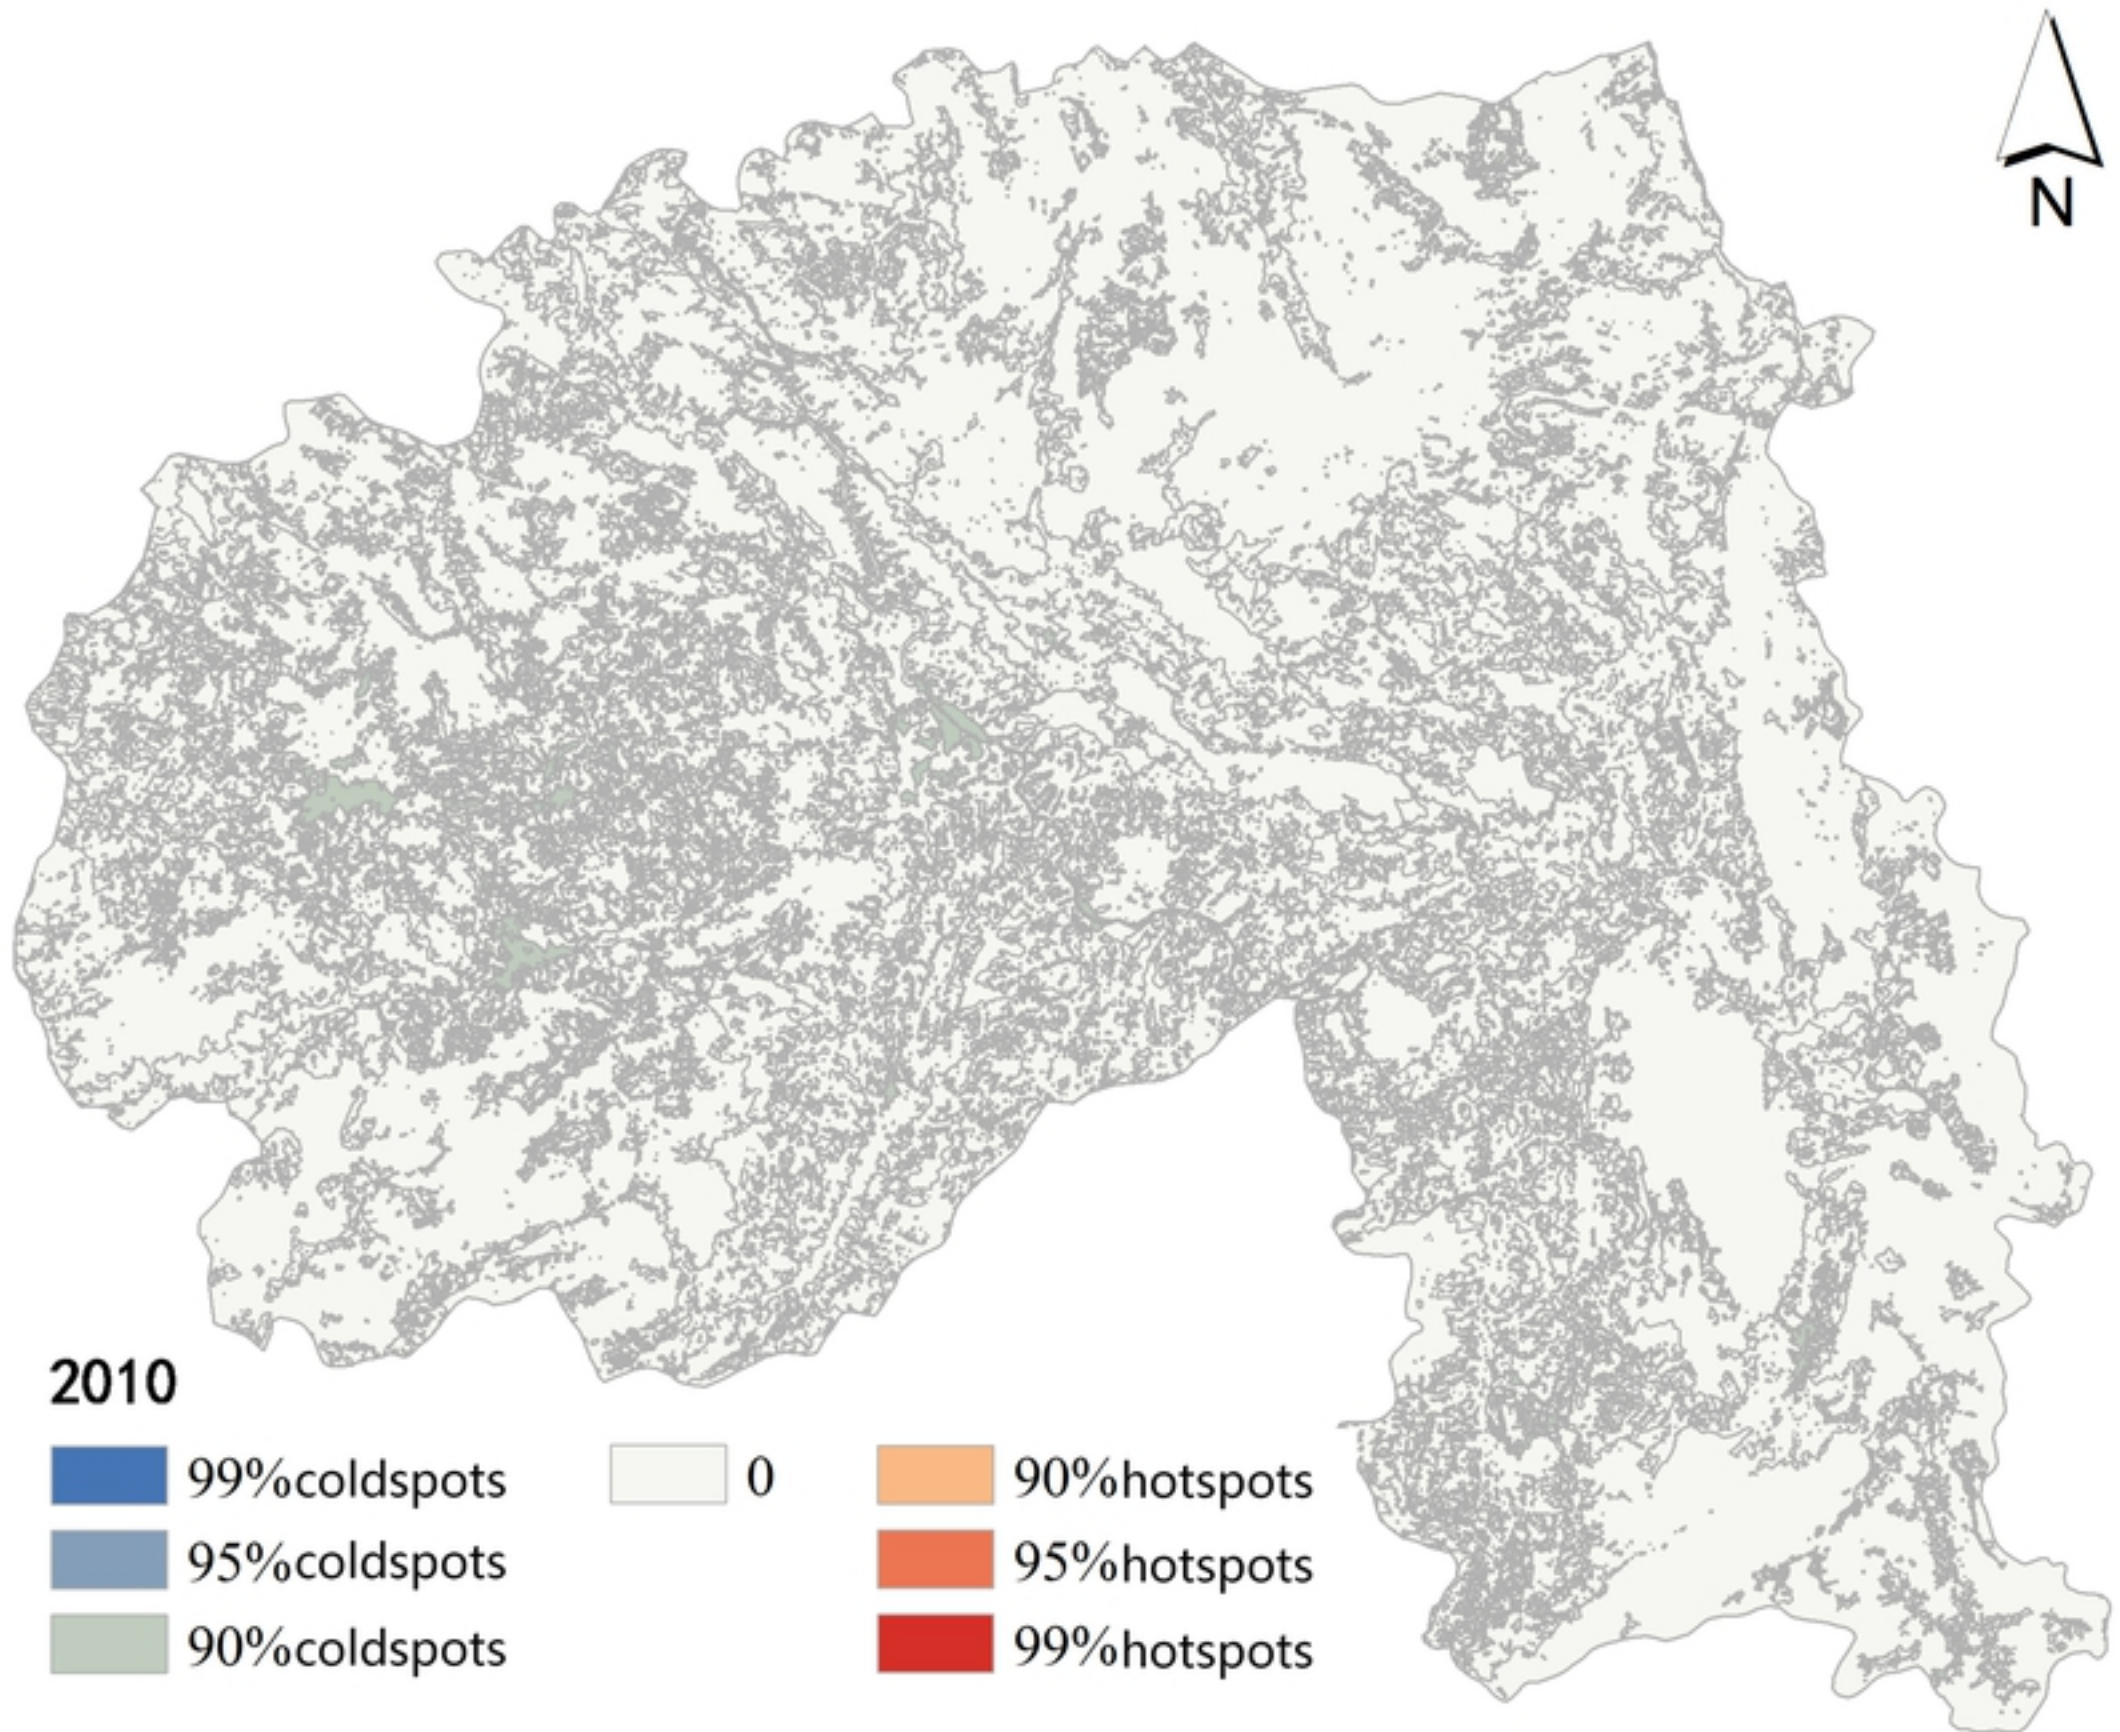



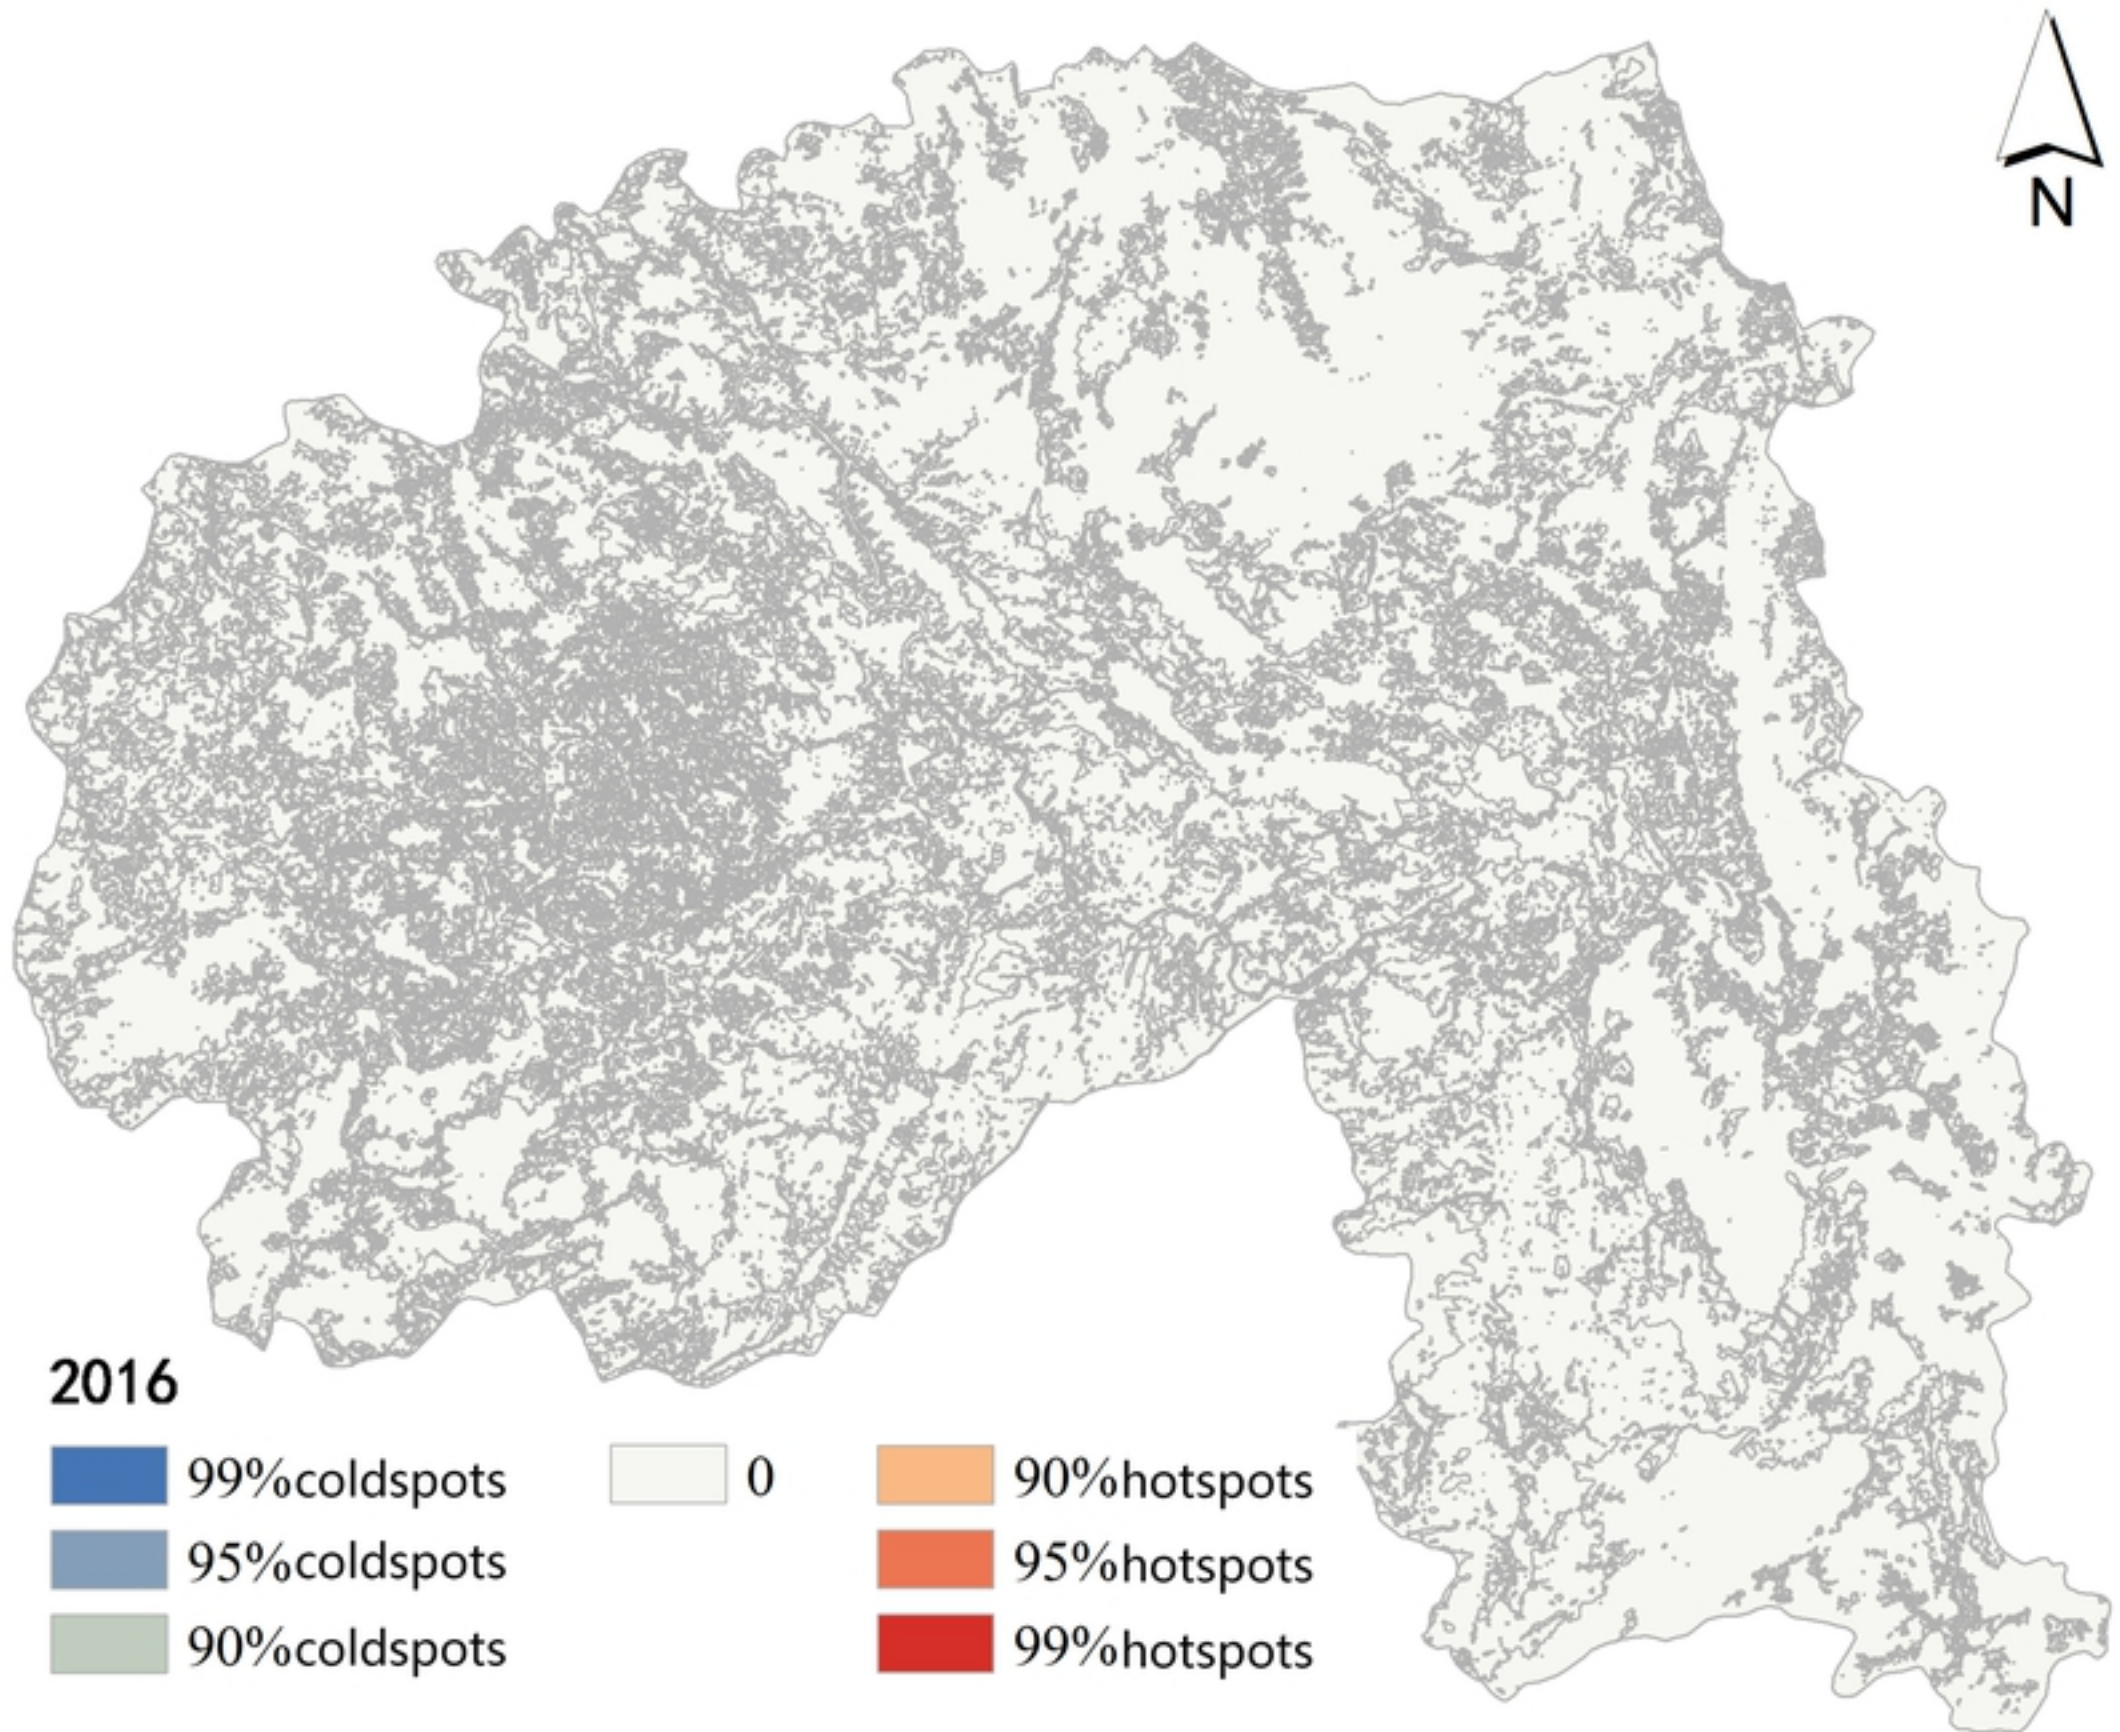

Source: https://www.biorxiv.org/content/10.1101/2020.02.13.947317v1.full.pdf
